1           **Undulatory locomotion of flexible foils as biomimetic**  
2                           **models for understanding fish propulsion**

3  
4  
5  
6  
7           Ryan M. Shelton<sup>1,2</sup>, Patrick Thornycroft<sup>1</sup>, and George V. Lauder<sup>1</sup>

8  
9  
10  
11           <sup>1</sup>The Museum of Comparative Zoology, 26 Oxford St., Harvard University, Cambridge, MA  
12           02138, USA

13  
14           <sup>2</sup>Current address: Department of Biology, CB# 3280 Coker Hall, University of North Carolina  
15                           Chapel Hill, NC 27599-3280

16  
17  
18           **Author for correspondence:**

19           George V. Lauder

20           E-mail: [glauder@oeb.harvard.edu](mailto:glauder@oeb.harvard.edu)

21           Phone: 617-496-7199

22  
23  
24  
25           Running title: Biomimetic models of fish locomotion

26

27

28

## SUMMARY

29

30 An undulatory pattern of body bending in which waves pass along the body from head to tail  
31 is a major mechanism of creating thrust in many fish species during steady locomotion.

32 Analyses of live fish swimming have provided the foundation of our current understanding of  
33 undulatory locomotion, but our inability to experimentally manipulate key variables such as  
34 body length, flexural stiffness, and tailbeat frequency in freely-swimming fish has limited our  
35 ability to investigate a number of important features of undulatory propulsion. In this paper  
36 we use a mechanical flapping apparatus to create an undulatory wave in swimming flexible  
37 foils driven with a heave motion at their leading edge, and compare this motion to body  
38 bending patterns of bluegill sunfish (*Lepomis macrochirus*) and clown knifefish (*Notopterus*  
39 *chitala*). We found similar swimming speeds, Reynolds and Strouhal numbers, and patterns  
40 of curvature and shape between these fish and foils suggesting that flexible foils provide a  
41 useful model for understanding fish undulatory locomotion. We swam foils with different  
42 lengths, stiffnesses, and heave frequencies while measuring forces, torques, and  
43 hydrodynamics. From measured forces and torques we calculated thrust and power  
44 coefficients, work, and cost of transport for each foil. We found that increasing frequency and  
45 stiffness produced faster swimming speeds and more thrust. Increasing length had minimal  
46 impact on swimming speed, but had a large impact on Strouhal number, thrust coefficient,  
47 and cost of transport. Foils that were both stiff and long had the lowest cost of transport (in  
48  $\text{mJ m}^{-1} \text{g}^{-1}$ ) at low cycle frequencies, and the ability to reach the highest speed at high cycle  
49 frequencies.

50

51

53 Fish perform undulatory locomotion with their flexible bodies to move forward steadily by  
54 passing a wave of bending from the head toward the tail (Jayne and Lauder, 1995a; Lauder  
55 and Tytell, 2006; Long et al., 1994; McHenry et al., 1995). Undulatory propulsion involves  
56 sequential activation of the segmental musculature by the nervous system, and this wave of  
57 electrical activity passes back toward the tail at a higher speed than the wave of bending  
58 (Jayne and Lauder, 1995b, c; Rome et al., 1993; Syme and Shadwick, 2002). Kinematic  
59 studies have shown that in many fishes swimming steadily by undulatory propulsion, the  
60 front third of the body remains relatively still at lower swimming speeds, and as speed  
61 increases oscillations of the front portion of the body also increase heaving from side to side  
62 (review in Lauder and Tytell, 2006). The side-to-side (heave) motion of the body region  
63 increases in amplitude as it passes down the body (Long et al., 1994; Donley and Dickson,  
64 2000). Analyses of tail (caudal fin) motion have also emphasized the role that this structure  
65 plays in generating propulsive forces (e.g., Affleck, 1950; Gibb et al., 1999; Magnuson,  
66 1978), and three-dimensional body geometry clearly plays an important role in patterns of  
67 thrust generation (Tytell, 2006; Tytell et al., 2008).

68         These experimental studies of freely-swimming fishes have provided a wealth of  
69 information about the locomotion of a diversity of fish species, and have served to focus  
70 attention on different modes of fish propulsion and changes in locomotor style with  
71 environment (e.g., Liao et al., 2003a, b; Webb, 2006). But study of live fishes has certain  
72 limitations that cannot easily be overcome. For example, measuring the effects of changing  
73 flexural stiffness, cycle frequency, and body length cannot be isolated from the many other  
74 variables involved with a live swimming fish. Measuring forces on freely swimming fishes is  
75 also difficult (e.g., Peng et al., 2007, 2008). It is not possible to alter individual factors  
76 involved in undulatory propulsive dynamics and assess their contribution to swimming  
77 performance by studying live fishes alone.

78         However, simple robotic models of undulatory locomotion in fishes can be used to  
79 good advantage and allow relatively rapid alteration of experimental parameters, assessment  
80 of the effect of making these alterations on locomotor performance, and a comprehensive  
81 assessment of locomotor forces, torques, and derived physical quantities such as the cost of  
82 transport (Bhalla et al., 2013; Lauder et al., 2007, 2011a, 2012; Ramananarivo et al., 2013;  
83 Wen and Lauder, 2013). More complex robotic models of undulatory locomotion have the  
84 advantage of being more biomimetic (Barrett et al., 1999; Liu and Hu, 2006; Long et al.,

85 2006a, b, 2011; Tangorra et al., 2010), but are more difficult to alter quickly and change  
86 individual parameters like flexural stiffness.

87 In this paper we compare undulatory locomotion in two species of live fishes to  
88 swimming by four rectangular flexible foils driven by a robotic controller at their leading  
89 edge. The flexural stiffness of these two foils was chosen to match the passive body stiffness  
90 reported for fishes in the literature (Long et al., 1994, 2002). We analyze the self-propelled  
91 swimming speeds of these foils as we vary flexural stiffness, cycle frequency, and length.  
92 These three parameters were chosen because they encompass much of the variation in fish  
93 swimming kinematics based on previous studies of live fish locomotion (e.g., Bainbridge,  
94 1958; Donley and Dickson, 2000; Webb, 1975), and because prior studies of swimming flexible  
95 foils suggested that length and stiffness were key parameters governing locomotor dynamics  
96 (Alben et al, 2012; Hua et al., 2013; Long et al., 1994). Although swimming foils of  
97 rectangular shape represent a considerable simplification of the complex three-dimensional  
98 geometries of fishes and ignore features such as tail structure, we focus here on the stiffness  
99 and length properties of swimming foils compared to fishes (maintaining uniform thickness  
100 and flexibility along the length), and future studies could extend the approach taken in this  
101 paper to more complex and fish-like flexible surfaces.

102 In this paper we compare undulatory foil swimming to that of live fish by measuring  
103 body curvature, swimming speed, cycle frequency, Strouhal number, and Reynolds number.  
104 Analysis of patterns of foil force and torque produced during swimming allows calculation of  
105 cost of transport, and force and power coefficients of these foils during self-propulsion. We  
106 initially hypothesized that, for the foils, swimming speed would increase with frequency  
107 based on previous data from swimming fishes (e.g., Bainbridge, 1958), that increasing length  
108 should reduce swimming efficiency due to the greater drag incurred by the longer foils  
109 actuated only at their leading edge, and that increasing stiffness (within the range studied  
110 here) would increase swimming efficiency and reduce cost of transport based on a previous  
111 study with foils of different shapes (Lauder et al., 2011b).

112 Our overall goal is to provide an analysis of the effects of length and flexural stiffness  
113 during steady swimming with undulatory waves using a mechanical flapping foil apparatus  
114 which allows exploration of the basic mechanics of undulatory propulsion in ways not  
115 possible by studying live fish, while recognizing that these swimming foils represent a  
116 considerable simplification of fish body geometry (Tytell et al., 2008). Finally, we suggest  
117 that this approach allows a general estimate of the flexural stiffness of the bodies of freely-  
118 swimming fishes, as measuring this parameter has to date been extremely challenging.

119

120

## RESULTS

121

### Foil and fish self-propelled kinematics

122 In both bluegill and clown knifefish, the front portion of the body moved much less than the  
123 posterior region throughout the tail beat cycle, and a wave of body bending passed from head  
124 toward the tail. Knifefish started undulatory motion halfway down the body (Fig. 1a) and  
125 created approximately three quarters of a wave along the body as seen in the expanded  
126 ventral view midline snapshots (Fig. 1c, e). Bluegill undulated with the last quarter of the  
127 body (Fig. 1b) and made roughly one quarter of a wave with reduced body bending compared  
128 to knifefish (Fig. 1d, f). The shape of the knifefish posterior body region during swimming  
129 (Fig. 1e) was very similar to the swimming shape of the tan 10 cm length flexible foil when  
130 actuated at 2 Hz (Fig. 2). Undulation of the sunfish posterior body region (Fig. 1f) resembled  
131 the stiffer yellow 10 cm foil actuated at 2 Hz (Fig. 2).

132 The effect of varying lengths, stiffness, and frequencies on foil swimming shape can  
133 be seen in Figure 2. Flexible tan foils had shorter wavelengths and larger amplitudes than the  
134 stiffer yellow foils. The longer foils had similar shapes and wavelengths to their shorter  
135 counterparts but continued the pattern over their longer length. Generating foil motion at  
136 higher frequencies increased the number of waves seen on each foil. The tan 20 cm foil  
137 showed an increase from 0.5 waves to 1.25 waves, and the yellow 20 cm foil increased from  
138 0.25 waves to 0.6 waves over the frequency range of 0.5 to 3 Hz (Fig. 2).

139 Swimming speeds of bluegill and knifefish varied with cycle frequency, and the  
140 pattern of swimming speed change with frequency was similar to that observed in the two  
141 swimming foils (Fig. 3). Bluegill data points fall within the yellow foil data range, while  
142 knifefish data are at or just below tan foil velocities. Self-propelled speeds ranged from 7 to  
143  $14 \text{ cm s}^{-1}$  at 1 Hz, 16 and  $27 \text{ cm s}^{-1}$  at 2 Hz, and 27 to  $32 \text{ cm s}^{-1}$  at 3 Hz for the foils and fish  
144 combined. The regression lines of fish and foils were similar in slope, although the tan foils  
145 had slightly lower slopes (Table 1). The coefficient of determination ( $R^2$ ) showed a  
146 significant correlation between self-propelled speed and cycle frequency for all of the foils  
147 and knifefish, with a lower (but still significant) correlation for bluegill. Bluegill use their  
148 pectoral fins periodically even during undulatory swimming which may have caused greater  
149 variation in these data, even though sequences with minimal pectoral fin movement were  
150 chosen (also see Drucker and Lauder 2000, 2005).

151 Analysis of covariance (ANCOVA; also see Table 1) demonstrated (1) a highly  
152 significant effect of frequency (regression model  $P < 0.001$ ) for both fish and foils on  
153 swimming speed, (2) no significant difference between the fish and flexible tan foil  
154 regressions ( $P > 0.06$ ), (3) no significant interaction between fish and flexible tan foil data  
155 ( $P > 0.7$ ), and (4) a significantly higher slope for the stiffer (yellow) foil regressions ( $P < 0.001$ ).

156 Measurement of maximum curvature for swimming fish or foils during a flapping  
157 cycle (Fig. 4) showed that foil curvatures for the stiff (yellow) foils remained small over the  
158 range of frequencies, while the more flexible tan foil curvatures increased steadily as  
159 frequency increased. This pattern is also visually evident in the foil midline snapshots shown  
160 in Figure 2. Foil length had little impact on maximum curvature. Curvature of the bluegill  
161 sunfish body was intermediate between the tan and yellow foil data at higher frequencies,  
162 while knifefish maximum body curvatures were higher than that of either foil (even  
163 excluding the very high curvature near the tail tip).

164 Reynolds numbers measured for swimming fish and self-propelling foils in this study  
165 were similar (Fig. 5a). Between 1 and 3 Hz, the frequencies for which we have data for both  
166 fish and foils (Fig. 5), fish Reynolds numbers ranged from 19,000 to 58,000 and foil  
167 Reynolds numbers ranged from 10,000 to 64,000. Over the same frequencies, fish Strouhal  
168 numbers measured here varied from 0.29 to 0.5 compared to foils with a range of 0.24 to  
169 0.38 (Fig. 5b).

170

171

### Foil swimming performance surfaces

172 Performance surfaces for short 10 cm (Fig. 6) and long 20 cm (Fig. 7) foils show that  
173 both thrust and efficiency tend to increase as frequency increases. The stiff (yellow) foils  
174 have higher thrust coefficients than flexible (tan) foils at both lengths although the difference  
175 in thrust is small at the highest frequencies at the slowest swimming speeds. For a given  
176 stiffness at most swimming speeds, the shorter 10 cm long foils generate higher thrust than  
177 the longer 20 cm foils. For example, at a swimming speed of 0.2 m/s, the stiff 10 cm foil  
178 produces a mean thrust coefficient nearly twice that of the 20 cm foil.

179 Swimming efficiency shows a more complex pattern. At the two highest swimming  
180 speeds at higher heave values, the stiff foils have greater locomotor efficiency (Figs. 6, 7)  
181 than the flexible foils. But at low swimming speeds the flexible tan foils have generally  
182 higher efficiencies. For example, at a swimming speed of 0.1 m/s, the 10 cm long flexible  
183 foil has higher swimming efficiency for most of the frequency range (Fig. 6). At this same  
184 swimming speed, the 20 cm long foil curves cross so that below 1.6 Hz (Fig. 7), the stiff foil

185 has greater efficiency while above this frequency the flexible foil has equal or greater  
186 efficiency. In general, as swimming speed increases, the disparity in efficiency between stiff  
187 and flexible foils increases, so that at the highest swimming speed of 0.3 m/s the stiff foils of  
188 both lengths show substantially greater efficiency than the flexible foils.

189

190

### Foil dynamics during self-propulsion

191

192

193

194

195

196

197

198

199

200

201

202

203

204

205

206

207

208

209

210

211

212

213

214

215

216

217

When swimming foils are self-propelling, the thrust ( $F_x$ ) and heave forces ( $F_y$ ) sum to zero when averaged over a flapping cycle. Therefore, force and torque ranges within a flapping cycle were measured to compare the magnitude of oscillation over a cycle. Repeated force measurements to assess error showed that one standard error of the mean for force and torque measurements ranged from 0.4% of the mean to 1.0% of the mean, and error bars are not shown in Figure 5 as they fall within the symbols. Yellow (stiffer) foils produced a significantly higher  $F_x$  range at middle frequencies (e.g., 2 Hz, Fig. 5c), and a higher  $F_y$  range at the two higher frequencies (Fig. 5d). At the lowest frequencies of 0.5 and 1.0 Hz, stiffness had relatively little effect on either  $F_x$  or  $F_y$  oscillation magnitudes. The ratio of  $F_y$  to  $F_x$  varied from 4.4 to 29.4 with a mean of 15.1, indicating that the output thrust forces were approximately 7% of input heave force. The torque from the twisting of the foil during swimming ( $T_z$ ) was minimal for the tan foils with a maximum range of 4.3 N mm, and was substantially larger for yellow foils at the two highest frequencies with a maximum range of 29.0 N mm (Fig. 5e). All of the forces and torques increased as frequency increased. Foil length had a relatively small effect on forces and torques.

The work done by each foil per cycle (Fig. 5f) increased with frequency and foil stiffness, while foil length made little difference. The cost of transport with respect to distance showed that being stiffer, and operating at higher frequencies took more energy (Fig. 5g), while foil length had only a small effect on cost. When standardized to foil mass, however, shorter, more flexible foils at higher frequencies require significantly more energy to swim at a given speed than other foils (Fig. 5h).

Over one flapping cycle,  $F_x$  (Fig. 8a) varied at twice the heave frequency, while  $F_y$  varied at the heave frequency (Fig. 8b), and no phase shifts in peak thrust were observed between foils of different lengths or stiffnesses. Thrust coefficients had a mean of zero over a flapping cycle as is expected for self-propelling foils. Shorter foils had approximately double the maximum thrust coefficient (of approximately 0.2) compared to the longer foils (Fig. 8c). Long foils had a maximum power coefficient of 0.6 while the short foils had a

218 maximum of 1.2 (Fig. 8d). From 1 to 3 Hz the mean power coefficients ranged from 0.23 to  
219 0.73.

220

221

### **Foil hydrodynamics**

222 The minimum absolute streamwise force ( $F_x$ ) on the tan 10 cm (Fig. 9a) and yellow 10 cm  
223 (Fig. 9b) foils occurred just prior to the foil shaft reaching its maximum lateral excursion  
224 when heave speed is slowing and a vortex is shed from the trailing edge of both foils.

225 Maximum streamwise force (Fig. 9c, d) occurred just prior to the shaft reaching its midpoint  
226 with maximum heave speed, and when a large leading edge vortex formed at the upstream  
227 foil margin for both foils. This x-force maximum occurred once while the foil was heaving to  
228 one side, and once while heaving to the other side, causing the x-force to oscillate with twice  
229 the heave frequency. Heave force ( $F_y$ ) oscillated with heave motion and peak  $F_y$  displayed a  
230 17% phase shift relative to heave motion for both the tan 10 cm and yellow 10 cm foils. This  
231 same pattern was observed for all foils at all frequencies. The mean  $F_x$  phase shift for all foils  
232 relative to heave motion was -3.9%.

233

234

## **DISCUSSION**

235

### **Comparisons between fish and foils**

236 Freely-swimming fish and passively flexible foils driven only at the leading edge have  
237 remarkably similar patterns of curvature and shape, Strouhal and Reynolds numbers, and  
238 changes in swimming speed with frequency (Figs. 1-3). However, ANCOVA analysis  
239 showed that the stiffer foils have increased slopes relative to both the more flexible tan foils  
240 and fish data, which collectively are not significantly different from each other (Table 1).

241 Although at first it might seem surprising that we should find such similarities, there  
242 are at least four reasons to expect that the locomotor performance of flexible foils and fish  
243 might be generally similar. First, when fish swim at speeds less than about two body lengths  
244 per second, only red muscle fibers are activated, and the large mass of white fibers in the  
245 body musculature is inactive electrically. In some fish such as largemouth bass (Jayne and  
246 Lauder, 1995b; Johnson et al., 1994) the red fibers only constitute about 1.5% of the body  
247 musculature, and during normal undulatory locomotion these fibers are thus bending a largely  
248 passive body in a flapping motion. Red muscle fibers are located in a thin strip down the  
249 midline of each side of the body just under the skin of most fishes. Patterns of body bending  
250 and hydrodynamics are thus dominated by properties of the mostly inactive body. White



251 muscle fibers which dominate the body mass are active only in high-speed (often unsteady)  
252 swimming motions, and during the c-start escape response of fishes (e.g., Jayne and Lauder,  
253 1993, 1994, 1995b).

254 Second, when fish are self-propelling at slow to moderate speeds with the anterior  
255 half of the body undergoing minimal side-to-side (heave) oscillation (Lauder and Tytell,  
256 2006), this body region is experiencing primarily drag force while the posterior body region  
257 is primarily generating thrust. At these swimming speeds, there is some spatial segregation  
258 of drag and thrust: when summed over the entire body, at self-propelled speeds net thrust  
259 must be equal and opposite to net drag. Regions of the locomotor performance space in  
260 which the swimming foils generate net thrust (Figs. 6, 7) are thus directly comparable to the  
261 thrust generating posterior body region. As a result, it is not surprising that kinematics of foils  
262 and the posterior region of self-propelling fish bodies are similar (Figs. 1, 2), and generate  
263 similar peak thrust forces of between 20 and 40 mN (Fig. 8) which is comparable to values  
264 estimated for mackerel swimming at one to two body lengths per second (Nauen and Lauder,  
265 2002a).

266 Third, several important behaviors exhibited by fishes swimming in flows have been  
267 shown to involve a nearly completely passive body. For example, trout swimming in a  
268 vortex street are able to alter the amplitude of their tail beat and pattern of body bending to  
269 utilize the vortical energy to maintain position passively. This behavior, termed the Karman  
270 gait, has been observed in several species (Liao et al., 2003a, b; Liao, 2004). Study of  
271 flexible foils and freshly dead fish in a vortex street also demonstrated the ability of passive  
272 fish bodies to hold position and create thrust (Beal et al., 2006).

273 Fourth, an additional feature of this study is our use of two flexible foils that possess  
274 flexural stiffnesses that are roughly equivalent to values that have been measured for dead  
275 fishes. Quantifying the time dependent flexural stiffness of a freely-swimming fish is a  
276 difficult challenge that has yet to be successfully accomplished. But a number of studies have  
277 estimated the flexural stiffness of fresh fish bodies, and we can compare these values to those  
278 measured for the flexible tan and yellow foils studied here. Long et al. (2002) measured the  
279 stiffness of freshly dead hagfish bodies, *Myxine glutinosa*, at a value of  $3 \times 10^{-4} \text{ Nm}^2$ . A  
280 separate study showed that when the muscles in freshly dead American eels, *Anguilla*  
281 *rostrata*, were activated with an electric current, the body flexural stiffness reached a value of  
282 triple the passive flexural stiffness, measured at  $1.8 \times 10^{-4} \text{ Nm}^2$  (Long, 1998). By comparing  
283 the swimming of live pumpkinseed sunfish (*Lepomis gibbosus*, closely related to and very  
284 similar in shape to the bluegill sunfish studied here), to the swimming of three-dimensional

285 vinyl models of sunfish, it was predicted that sunfish double their passive body stiffness  
286 while swimming (McHenry et al., 1995): values measured for passive sunfish bodies ranged  
287 from approximately  $1 \times 10^{-3} \text{ N m}^2$  near the head, to  $1 \times 10^{-6} \text{ N m}^2$  near the tail.

288 Based on the similar kinematics (Figs. 1 and 2) and similar self-propelled swimming  
289 speeds relative to cycle frequency (Fig. 3, Table 1) between swimming knifefish and the tan  
290 foils, we predict that live swimming knifefish have a flexural stiffness similar to that of the  
291 tan foil material ( $3.3 \times 10^{-5} \text{ N m}^2$ ). Furthermore, we expect that swimming sunfish have a  
292 similar body flexural stiffness to the yellow foil material ( $9.9 \times 10^{-4} \text{ N m}^2$ ). Using flexible  
293 foils of similar flexural stiffness to that estimated for fishes allows us to quantify dynamics  
294 such as patterns of forces and torques throughout the flapping cycle that would be impossible  
295 on a freely-swimming fish.

296 Although the kinematic patterns displayed by undulatory fish motion (Fig. 1) and the  
297 flexible foils studied here (Fig. 2) are generally similar, it is noteworthy that the flexible foils  
298 under self-propulsion tend to show only limited amplitude increases along their length  
299 compared to kinematic patterns typically shown by swimming fishes. This difference could  
300 be due to several factors, most importantly the uniform flexural stiffness of the foils  
301 compared to the complexly varying body stiffness of fishes, both temporally during a  
302 locomotor cycle, and also spatially along the body. But the swimming foils, under conditions  
303 of net thrust generation (i.e., the positive thrust coefficient region of the performance surfaces  
304 in Figures 6 and 7) do show amplitude increases along their length (data not shown here).  
305 This suggests that foils swimming under these conditions could be thought of as functioning  
306 like the posterior body region of swimming fishes, generating net thrust in distinction to the  
307 generally low amplitude drag-incurring anterior body region. Further comparisons of foil  
308 kinematics under different thrust conditions as well as the study of flexible foils with  
309 different stiffness properties along their length will help in explaining the cause of kinematic  
310 amplitude differences between fish and swimming foils.

311

312

### **Flexible foil propulsion**

313 Analysis of foil propulsion data demonstrates that self-propelled swimming speeds, forces,  
314 and torques increase as frequency and foil stiffness increase, but that length increase makes  
315 relatively little difference in locomotor performance (Figs. 3, 6, 7). Overall, the work done  
316 per cycle ranges from 0.5 to 21.7 mJ, the cost of transport (COT) with respect to distance  
317 ranges from 3.2 to 204.6  $\text{mJ m}^{-1}$ , and the cost of transport with respect to distance and mass  
318 together ranges from 2.0 to 106.6  $\text{mJ m}^{-1} \text{ g}^{-1}$ . The work per cycle and cost of transport with

319 respect to distance follows similar trends to the self-propelled speeds, but the cost of transport  
320 relative to mass and distance shows that stiffer and longer foils are more efficient when foils  
321 swim at their self-propelled speeds. Averaging all of the trials, 10 cm foils cost 80% more  
322 than 20 cm foils, and flexible tan foils cost 159% more than the stiffer yellow foils when  
323 COT is measured in  $\text{mJ m}^{-1} \text{g}^{-1}$ . This suggests that when comparing flexible propulsors of  
324 equal mass, the longer stiffer foils can swim more efficiently given the stiffness range studied  
325 here at self-propelled speed, and this is also reflected in the efficiency values shown in Figure  
326 7 over a range of swimming speeds. The longer, stiff foil achieved higher efficiencies than  
327 the short flexible foil at higher swimming speeds. Stiffer propulsors, like the yellow foils, are  
328 also able to reach higher speeds when they expend more energy.

329         Lauder et al. (2011b) presented data on self-propelled swimming speeds of flexible  
330 foils of fixed length versus flexural stiffness that covers a greater range of flexural stiffness  
331 than that studied here. They showed that for foils actuated in heave only at the leading edge,  
332 an optimum flexural stiffness existed at which swimming speed was maximized. When pitch  
333 actuation was added to the heave motion, however, no single peak swimming speed was  
334 found, and instead a broad plateau at which stiffness had little effect on swimming speed  
335 occurs above a flexural stiffness of  $0.2 * 10^{-4} \text{ N m}^3$ . Although no forces were measured in the  
336 Lauder et al. (2011b) study, those data in conjunction with those presented here suggest that  
337 modulation of the motion program and stiffness can be used to alter swimming performance.  
338 If fish muscle activation patterns can be tuned to alter the motion of the flexible body, and  
339 body stiffness altered over a three-fold range by changing the activation of body or fin  
340 musculature, then fish may be able to adjust their position on the performance curve to suit  
341 the demands of any particular locomotor situation.

342         In this study we focused on comparisons between flexible foils of two lengths and  
343 found relatively few substantial effects of differences between the 10 cm and 20 cm length on  
344 self-propelled swimming speed, although length did affect the cost of transport calculations  
345 by changing the mass of the swimming foils. However, the effect of length alone on  
346 swimming performance can be complex, with the occurrence of resonance peaks at different  
347 lengths. Alben et al. (2012) describe an analytical model of foil swimming performance and  
348 demonstrate a resonance phenomenon whereby the swimming speed of flexible foils can  
349 change in a non-linear manner that depends on foil length and stiffness. They modeled  
350 locomotion over a wide range of foil lengths to illustrate how foil length can affect swimming  
351 speed and found that certain lengths can interact negatively with flows generated near the  
352 front of the foil, and that this slows down self-propelled swimming speeds. Other foil lengths

353 can induce positive interactions that result in faster swimming speeds. In this paper we only  
354 studied foils of two different lengths, and did not find any substantial differences in self-  
355 propelled swimming speeds between these two lengths for the two foil materials studied. But  
356 a more complete study of a wide variety of foil lengths may find effects on thrust and cost of  
357 transport that are were not detectable here with a study of only two lengths.

358 We are not aware of other studies that have measured forces and torques from self-  
359 propelling foils with fish-like flexibility, but it is useful to compare our mean power  
360 coefficients with those from stiff (inflexible) towed foils as represented by the experiments  
361 reported by Read et al. (2003). At a Strouhal number of 0.28, the mean from our foils, Read  
362 et al. measured mean power coefficients around 0.6 which is slightly higher than our mean of  
363 0.43. Rigid foils should be able to produce more propulsive power than a highly flexible foil  
364 under certain conditions, but it is noteworthy that power coefficient values for these highly  
365 flexible foils are in the same general range as those for stiff foils. The instantaneous power  
366 coefficient drops below zero for a small fraction of the cycle for all of the foils that we  
367 studied, which means that at this moment the water was doing work on the foil, but this effect  
368 is greater for the flexible tan foil than for the stiffer yellow foil (Fig. 8). The peak to peak  
369 thrust coefficient amplitudes for the flexible foils studied here range from 0.1 to 0.8 which is  
370 much less than that observed for rigid foils where peak thrust coefficients can reach values of  
371 2.

372 When foils are self-propelling, all of the mean thrust coefficients equal zero (averaged  
373 over a flapping cycle), and this is an important condition of true self-propulsion: data shown  
374 for foils in which the thrust coefficient does not average to zero over a cycle indicate that the  
375 foil was not self-propelling, but was being towed at a speed either higher or lower than self-  
376 propelled swimming speed -- see Lauder et al., 2011a. Data showing this pattern could also  
377 indicate that the thrust being generated by the towed flapping object or foil was not sufficient  
378 to overcome mean drag, and so the foil would not swim forward on its own if it were not  
379 being forcibly towed. However, given that the posterior region of the fish body is the region  
380 where muscular work is positive and contributing to thrust generation (Rome et al., 1993;  
381 Johnson et al., 1994), experimental conditions with a mean positive thrust coefficient (Figs. 6,  
382 7) can be thought of as representing the thrust generating region of the fish body that must  
383 generate net positive thrust to overcome drag of the mostly immobile anterior body region.

384 Katz and Weihs (1979) conducted a computational study of a flexible slender wing  
385 and examined the effects of chordwise flexibility on thrust and efficiency of swimming.  
386 They found an increase in thrust coefficient up to an intermediate level of flexibility and a

387 plateau where little increase in thrust was seen as flexibility increased further. In our data, the  
388 stiff (yellow) foils showed higher thrust coefficients than the corresponding flexible (tan)  
389 foils of the same length. For foils of the same stiffness, shorter foils had higher thrust  
390 coefficients than the longer foils.

391 In this paper we show that flexible foils actuated only in heave at the leading edge  
392 perform in a manner generally similar to undulating fish bodies and we estimate that the  
393 flexural stiffness of two species of freely-swimming fishes is in the range of that measured  
394 for the foil materials that we studied here. However, future experiments could certainly  
395 expand on this approach to incorporate active flexion of body segments into the design of a  
396 flexible self-propelling model for fish propulsion. Past experiments on robotic devices of this  
397 nature have proven extremely useful in understanding the nature of locomotor dynamics in  
398 undulating bodies (e.g., Barrett et al., 1999). In addition, flexible foils could be used to study  
399 the dynamics of unsteady locomotor behaviors such as linear accelerations and c-start escape  
400 responses in fishes. These behaviors have received recent attention from experimental  
401 hydrodynamicists (Borazjani et al., 2012, Tytell, 2004, Tytell and Lauder, 2008) but have yet  
402 to be modeled with robotically controlled devices that allow direct measurement of forces  
403 and torques.

404

405

## MATERIALS AND METHODS

406 We obtained data from two fish species, swimming freely in a recirculating flow tank, that  
407 differ in the pattern of body bending to permit comparison to similar data obtained for two  
408 robotic flapping foils that differ in flexural stiffness. We chose bluegill sunfish (*Lepomis*  
409 *macrochirus*, Rafinesque) and clown knifefish (*Notopterus chitala*, Hamilton) because they  
410 vary in apparent body stiffness and undulatory wave characteristics, with bluegill sunfish  
411 possessing relatively stiff bodies and longer undulatory wavelengths relative to the more  
412 flexible and shorter wavelengths displayed by clown knifefish. For the three individuals of  
413 each species studied, mean fish total length (L) was 19.7 cm for bluegill and 19.3 cm for  
414 knifefish. Experiments were conducted under an approved animal IACUC protocol from  
415 Harvard University (#20-03).

416 Individuals of both species swam in a recirculating flow tank as in previous experiments  
417 (Lauder and Drucker, 2004; Lauder, 2006; Lauder and Tytell, 2006) at three speeds: 0.5, 1.0,  
418 and 1.5 L/sec. Fish acclimated to the flow tank for several hours before testing began. Two  
419 Photron PCI-1024 high-speed cameras taking video at 500 Hz (1 megapixel resolution per

420 frame) provided side and bottom views of fish undulatory locomotion simultaneously,  
421 allowing the calculation of tailbeat frequencies, body curvatures, and Strouhal numbers. We  
422 used a custom MATLAB (v7.1, MathWorks, Inc., Natick, MA, USA) program to digitize the  
423 midline in images from a ventral view at successive time intervals for both swimming fishes  
424 and flexible foils, and another custom program to calculate curvature data from the digitized  
425 ventral midline coordinates (also see curvature calculation methods in our previous papers,  
426 e.g., Chadwell et al., 2012; Flammang et al., 2013; Standen and Lauder, 2005). We divided  
427 the length of each fish and foil into 200 equally spaced points, and calculated the curvature  
428 between each set of 16 points using the two end points. This results in the curvature of every  
429 0.5 or 1.0 cm length of the ventral midline depending on the fish or foil length. The  
430 maximum curvature was simply the largest curvature value along the length of the body.

431 Reynolds number is calculated as  $(U*L)/\nu$ , where  $U$  is swimming speed,  $L$  is either  
432 fish or foil length, and  $\nu$  is the kinematic viscosity of water (taken as  $1.004 * 10^{-6} \text{ m}^2/\text{s}$  at  $20^\circ$   
433 C). Strouhal number equals  $(f*A)/U$  where  $f$  is the tail beat or flapping frequency,  $A$  is the  
434 total peak-to-peak tail beat amplitude, and  $U$  is swimming speed. Propulsive efficiency is the  
435 thrust coefficient divided by the power coefficient (Read et al., 2003), and work is calculated  
436 as the force in the  $y$ -direction (since the foils were moved in heave ( $y$ ) only) times the  
437 distance moved (we obtain this from motor encoders that measure foil shaft motion). Power  
438 is force times velocity of the heave motion, and the power divided by the swimming velocity  
439 gives the cost of transport in Joules/meter. The same foil shaft was used to hold all foils and  
440 we used the same configuration as in our previous papers using flexible foils (e.g., Alben et  
441 al., 2012; Quinn et al., 2014; Wen and Lauder, 2013) in which the shaft holds the foil leading  
442 edge between two halves which are screwed together to prevent slipping and bending of the  
443 foil leading edge, with the shaft attached to a carriage placed above a recirculating flow tank.  
444 We have not “subtracted” the effect of the foil shafts as the test conditions were the same for  
445 all foils. Separate tests (not included in this paper) show that the foil shafts do not contribute  
446 significantly to thrust because the foils and shafts are moved in heave (side to side motion)  
447 only. However, the flat foil shaft holders will increase the recorded  $y$ -forces, and hence the  
448 calculated cost of transport. The cost of transport data presented here should thus be viewed  
449 as comparative among the foils studied, but not directly comparable to data obtained, for  
450 example, from metabolic studies of swimming fishes.

451 For comparison to patterns of fish locomotion, we used two flexible plastic foil  
452 materials of two different lengths. The plastic foil material comes from a collection of plastic

453 shim stock (ARTUS Corp., Englewood, NJ) with each thickness coded with a unique color.  
454 For convenience of description, we will refer to the two foils used here by their colors and/or  
455 stiffnesses: the relatively flexible tan foil material (thickness 0.25 mm) and the relatively stiff  
456 yellow foil (thickness 0.5 mm). Foil height is 6.8 cm (chosen to correspond to our previous  
457 work with both rigid and flexible foils) with measured flexural stiffnesses of  $3.3 * 10^{-5} \text{ N m}^2$   
458 for tan foils, and  $9.9 * 10^{-4} \text{ N m}^2$  for yellow foils (see Alben et al., 2012; Lauder et al. 2007,  
459 2011a, b). Foil lengths are 10 cm and 20 cm, with masses of 1.0 g and 2.0 g for the flexible  
460 tan foils at these respective lengths, and 4.8g and 9.4 g for the stiffer yellow foils.

461 We collected flapping foil data using the mechanical flapping apparatus from our  
462 previous research (Alben et al., 2012; Flammang et al., 2011; Lauder et al., 2011a, b, 2012;  
463 Quinn et al., 2014; Wen and Lauder, 2013), and we made three general types of  
464 measurements on each foil.

465 First, we quantified a “performance surface” for each foil shape and stiffness by  
466 varying heave amplitude and frequency: 52 data points served as a map of the performance  
467 surface (efficiency or thrust coefficient vs. frequency and heave) with frequency ranging  
468 from 0.50 to 3.00 Hz in 0.25 Hz increments, and heave amplitude varying from 1.0 to 3.0 cm  
469 in 0.5 cm increments. An ATI Nano-17 six-axis force/torque sensor (ATI Inc., Apex, North  
470 Carolina) attached to the foil shaft allowed 3 force and 3 torque measurements in an XYZ  
471 coordinate system: X pointed upstream, Z pointed up the shaft, and Y pointed in the  
472 direction of heave (normal to the free-stream flow). Foils under these test conditions were  
473 anchored above the flow tank with the foil shaft fixed to the heave and pitch motors (see  
474 Alben et al., 2012; Quinn et al., 2014; Wen and Lauder, 2013). Flow speeds varied from 0.1  
475 to 0.3 m/s. For each performance surface for each foil, and we altered flow speed with heave  
476 amplitude so that the Strouhal number for a given frequency remained constant over the  
477 heave range. The Strouhal number for each test is equal to 1/5 of the frequency at each  
478 different heave value. We replicated each surface five times for each foil, and calculated  
479 thrust coefficients and efficiency for each combination of heave and frequency following the  
480 equations in Read et al. (2003). Propulsive efficiency equals the thrust coefficient divided by  
481 the power coefficient, and work is given as the force in the y-direction (since the foils were  
482 moved in heave (y) only) times the distance moved (obtained from motor encoders that  
483 measure foil shaft motion). Power is calculated as force times the velocity of heave motion,  
484 and power divided by the swimming velocity gives the cost of transport in Joules/meter. The  
485 self-propelled speed for each foil on each performance surface (and in the plots shown

486 beneath in Figures 6 and 7) occurs where the mean thrust coefficient shown on the y-axis  
487 (which is averaged over the flapping cycles) is zero.

488 Because these performance surfaces are hard to visualize in two dimensions in in  
489 Figures 6 and 7, we provide as supplemental data two MATLAB .fig files with the data and  
490 surfaces for the four foils together: S1.Thrust.surface.fig, and S2.Efficiency.surface.fig.  
491 These files can be opened with MATLAB and rotated in three-dimensions to visualize the  
492 differences among the swimming flexible foils.

493 Second, we conducted focused experiments on foils swimming at their self-propelled  
494 speed for each foil type at each of the four frequencies. Fish swimming steadily do so at a  
495 self-propelled speed where thrust and drag forces are balanced over a tail beat cycle, and it is  
496 important to quantify foil swimming performance at self-propelled swimming speeds for  
497 comparison to fish data. A LABVIEW program controlling a motor on the carriage moved  
498 the shaft with a +/- 1cm sinusoidal heave motion at 0.5, 1, 2, and 3 Hz. We chose these  
499 parameters because they closely approximate the heave motion of the mid-body region and  
500 the frequencies used by fishes during undulatory propulsion.

501 Linear and rotary encoders placed on the carriage and the flow motor allowed a  
502 second LABVIEW program to calculate the self-propelled speed (SPS) for a foil after trials  
503 at a range of flow speeds. For these self-propelled experiments, we attached the foil shaft  
504 above the flow tank to linear air-bearings which allowed the foil to “swim” and move along  
505 the length of the tank. As foil actuation occurs, foils swim forward as they generate thrust and  
506 produce a small restoring force, and flow speed is then tuned to increase drag and bring each  
507 foil back to its mean starting position. Foils are thus free to move upstream and downstream  
508 over a short distance as the heave motion produces an undulatory wave along the flexible foil.  
509 The mean SPS was calculated 3 times for each foil and the results were averaged. This  
510 procedure followed our previous research in which flexible foils are allowed to self-propel,  
511 and thrust and drag forces are naturally balanced over a flapping cycle (Lauder et al., 2007,  
512 2011a, b, 2012).

513 Third, flow visualization around swimming foils quantified hydrodynamic patterns at  
514 the self-propelled speed for each foil with simultaneous measurement of swimming forces  
515 and torques using the ATI Nano-17 force/torque sensor. For these experiments, the foil shafts  
516 again were anchored above the flow tank, and the flow speed set to the previously-  
517 determined self-propelled speed. Two Photron high-speed cameras captured synchronized  
518 lateral and ventral views of the flapping foils. A LABVIEW trigger pulse synchronized the  
519 500 Hz data collection of heave position, force and torque magnitudes, and video frames.



520 When foils are self-propelling the mean thrust coefficient over a single flapping cycle should  
521 equal zero (Lauder et al., 2011a), and this condition was achieved for our self-propelling  
522 foils.

523 For hydrodynamic visualization, a continuous 10W Coherent argon-ion laser light  
524 sheet was generated at the mid-foil level, and provided data on the flow patterns generated  
525 along the length of the foil and in the wake. Analysis using DaVis 7.2 (LaVision Inc.,  
526 Goettingen, Germany) particle image velocimetry software as in our previous research  
527 (Drucker and Lauder, 2005; Nauen and Lauder, 2002a, b; Esposito et al., 2012) provided  
528 velocity vectors describing the flow patterns generated by the self-propelling flexible foils.  
529 Using LabChart 7 (ADInstruments, Inc., Colorado Springs, Colorado) software, a low pass  
530 filter was applied for Y and Z forces and X and Z torques. A band-pass filter was used for X  
531 forces and Y torques to reduce interference from the imposed heave frequency, and filter  
532 cutoffs were adjusted appropriately as heave frequency was changed among experiments.  
533 Five replicates of separate trials of the 20 cm long tan (flexible) foil actuated at 2 Hz showed  
534 a Y force standard error of 0.4% of the mean range and an X force standard error of 1.0% of  
535 the mean range. Similar values were obtained for the torques measured.

536 We performed statistical analyses using JMP Pro version 11 (SAS Inc., Cary North  
537 Carolina). Regressions of foil and fish swimming data used frequency as the independent  
538 variable and self-propelled speed as the dependent variable. Slopes, intercepts, error estimates  
539 for these parameters, and 95% confidence limits are calculated for each fish species and foil  
540 type (see Table 1). An analysis of covariance (ANCOVA) provided comparison among  
541 regression lines.

542

543

## ACKNOWLEDGEMENTS

544 We thank members of the Lauder and Tangorra Labs for many helpful discussions on fish  
545 fins and flexible flapping foil propulsion, Silas Alben for assistance in interpreting flapping  
546 foil results, Erik Anderson, Vern Baker, and Chuck Witt for their efforts in designing the  
547 robotic flapper and control and analysis software, and Grace Xiong for helping collect fish  
548 data. Brooke Flammang, Erik Anderson, and Erin Blevins provided many helpful comments  
549 on the manuscript.

550

551

## FUNDING

552 This work was supported by NSF grants EFRI-0938043 and CDI 0941674 to G. L..

553

554

## REFERENCES

- 555  
556
- 557 **Affleck, R. J.** (1950). Some points in the function, development, and evolution of the tail in fishes.  
558 *Proc. Zool. Soc. Lond.* **120**, 349-368.
- 559 **Alben, S., Baker, T. V., Witt, C., Anderson, E. J. and Lauder, G. V.** (2012). Dynamics of freely  
560 swimming flexible foils. *Phys. Fluids A*, **24**, 051901.
- 561 **Bainbridge, R.** (1958). The speed of swimming of fish as related to size and to the frequency and  
562 amplitude of the tail beat. *J. Exp. Biol.* **35**, 109-133.
- 563 **Barrett, D. S., Triantafyllou, M. S., Yue, D. K. P., Grosenbaugh, M. A. and Wolfgang, M. J.**  
564 (1999). Drag reduction in fish-like locomotion. *J. Fluid Mech.* **392**, 183-212.
- 565 **Beal, D. N., Hover, F. S., Triantafyllou, M. S., Liao, J. and Lauder, G. V.** (2006). Passive  
566 propulsion in vortex wakes. *J. Fluid Mech.* **549**, 385-402.
- 567 **Bhalla, A. P. S., Griffith, B. E. and Patankar, N. A.** (2013). A forced damped oscillation  
568 framework for undulatory swimming provides new insights into how propulsion arises in active  
569 and passive swimming. *PLoS Comput Biol* **9**, e1003097.
- 570 **Borazjani, I., Sotiropoulos, F., Tytell, E.D. and Lauder, G. V.** (2012). On the hydrodynamics of  
571 the bluegill sunfish c-start escape response: three-dimensional simulations and comparison with  
572 experimental data. *J. Exp. Biol.* **215**, 671-684.
- 573 **Chadwell, B. A., Standen, E. M., Lauder, G. V. and Ashley-Ross, M. A.** (2012). Median fin  
574 function during the escape response of bluegill sunfish (*Lepomis macrochirus*). II: fin-ray  
575 curvature. *J. Exp. Biol.* **215**, 2881-2890.
- 576 **Donley, J. and Dickson, K. A.** (2000). Swimming kinematics of juvenile Kawakawa tuna  
577 (*Euthynnus affinis*) and chub mackerel (*Scomber japonicus*). *J. Exp. Biol.* **203**, 3103-3116.
- 578 **Drucker, E. G. and Lauder, G. V.** (2000). A hydrodynamic analysis of fish swimming speed: wake  
579 structure and locomotor force in slow and fast labriform swimmers. *J. Exp. Biol.* **203**, 2379-2393.
- 580 **Drucker, E. G. and Lauder, G. V.** (2005). Locomotor function of the dorsal fin in rainbow trout:  
581 kinematic patterns and hydrodynamic forces. *J. Exp. Biol.* **208**, 4479-4494.
- 582 **Esposito, C., Tangorra, J., Flammang, B. E. and Lauder, G. V.** (2012). A robotic fish caudal fin:  
583 effects of stiffness and motor program on locomotor performance. *J. Exp. Biol.* **215**, 56-67.
- 584 **Flammang, B. E., Lauder, G. V., Troolin, D. R. and Strand, T.** (2011). Volumetric imaging of  
585 shark tail hydrodynamics reveals a three-dimensional dual-ring vortex wake structure. *Proc.*  
586 *Royal Soc. B* **278**, 3670-3678.
- 587 **Flammang, B. E., Alben, S., Madden, P. G. A. and Lauder, G. V.** (2013). Functional morphology  
588 of the fin rays of teleost fishes. *J. Morphol.* **274**, 1044-1059.
- 589 **Gibb, A.C., Dickson, K.A., Lauder, G.V.** (1999). Tail kinematics of the chub mackerel *Scomber*  
590 *japonicus*: testing the homocercal tail model of fish propulsion. *J. Exp. Biol.* **202**: 2433-47

- 591 **Hua, R.-N., Zhu, L. and Lu, X.-Y.** (2013). Locomotion of a flapping flexible plate. *Phys. Fluids* **25**,  
592 121901.
- 593 **Jayne, B.C. and Lauder, G.V.** (1993). Red and white muscle activity and kinematics of the escape  
594 response of the bluegill sunfish during swimming. *J Comp Physiol A* **173**, 495-508.
- 595 **Jayne, B. C. and Lauder, G. V.** (1994). How swimming fish use slow and fast muscle fibers:  
596 implications for models of vertebrate muscle recruitment. *J. Comp Physiol A* **175**, 123-131.
- 597 **Jayne, B. C. and Lauder, G. V.** (1995a) Speed effects on midline kinematics during steady  
598 undulatory swimming of largemouth bass, *Micropterus salmoides*. *J. Exp. Biol.* **198**, 585-602.
- 599 **Jayne, B. C. and Lauder, G. V.** (1995b). Red muscle motor patterns during steady swimming in  
600 largemouth bass: effects of speed and correlations with axial kinematics. *J. Exp. Biol.* **198**, 1575-  
601 1587.
- 602 **Jayne, B. C. and Lauder, G. V.** (1995c). Are muscle fibers within fish myotomes activated  
603 synchronously? Patterns of recruitment within deep myomeric musculature during swimming in  
604 largemouth bass. *J. Exp. Biol.* **198**, 805-815.
- 605 **Johnson, T .P., Syme, D. A., Jayne, B. C., Lauder, G. V. and Bennett, A. F.** (1994). Modeling red  
606 muscle power output during steady and unsteady swimming in largemouth bass (*Micropterus*  
607 *salmoides*). *Am. J. Physiol.* **267**, R481-R488.
- 608 **Katz, J. and Weihs, D.** (1979). Large amplitude unsteady motion of a flexible slender propulsor. *J.*  
609 *Fluid Mech.* **90**, 713-723.
- 610 **Lauder, G. V. and Drucker, E. G.** (2004). Morphology and experimental hydrodynamics of fish fin  
611 control surfaces. *IEEE J. Ocean. Eng.* **29**, 556-71.
- 612 **Lauder, G. V.** (2006). Locomotion, In *The Physiology of Fishes, Third Edition*, ed D H Evans and J  
613 B Claiborne (Boca Raton: CRC Press) pp 3-46.
- 614 **Lauder, G. V. and Tytell, E. D.** (2006). Hydrodynamics of undulatory propulsion, In *Fish*  
615 *Biomechanics. Volume 23 in Fish Physiology*, ed R E Shadwick and G V Lauder (San Diego:  
616 Academic Press) pp 425-68
- 617 **Lauder, G. V., Anderson, E. J., Tangorra, J. and Madden, P. G. A.** (2007). Fish biorobotics:  
618 kinematics and hydrodynamics of self-propulsion. *J. Exp. Biol.* **210**, 2767-2780.
- 619 **Lauder, G., Tangorra, J., Lim, J., Shelton, R., Witt, C. and Anderson, E. J.** (2011a). Robotic  
620 models for studying undulatory locomotion in fishes. *Marine Tech. Soc. J.* **45**, 41-55.
- 621 **Lauder, G. V., Madden, P. G. A., Tangorra, J., Anderson, E. and Baker, T. V.** (2011b).  
622 Bioinspiration from fish for smart material design and function. *Smart Mater. Struct.*  
623 **20**:doi:10.1088/0964-1726/20/9/094014.
- 624 **Lauder, G. V., Flammang, B. E. and Alben, S.** (2012). Passive robotic models of propulsion by the  
625 bodies and caudal fins of fish. *Int. Comp. Biol.* **52**, 576-587.
- 626 **Liao, J., Beal, D. N., Lauder, G. V. and Triantafyllou, M. S.** (2003a). Fish exploiting vortices  
627 decrease muscle activity. *Science* **302**, 1566-1569.

- 628 **Liao, J., Beal, D. N., Lauder, G. V. and Triantafyllou, M. S.** (2003b). The Kármán gait: novel  
629 body kinematics of rainbow trout swimming in a vortex street. *J. Exp. Biol.* **206**, 1059-1073.
- 630 **Liao, J.** (2004). Neuromuscular control of trout swimming in a vortex street: implications for energy  
631 economy during the Karman gait. *J. Exp. Biol.* **207**, 3495-3506.
- 632 **Liu, J.-D. and Hu, H.** (2006). Biologically inspired behaviour design for autonomous robotic fish.  
633 *Internat. J. Automat. Comput.* **3**, 336-347.
- 634 **Long, J. H., McHenry, M. J. and Boettcher, N. C.** (1994). Undulatory swimming: how traveling  
635 waves are produced and modulated in sunfish (*Lepomis gibbosus*). *J. Exp. Biol.* **192**, 129-145.
- 636 **Long, J.** (1998). Muscles, elastic energy, and the dynamics of body stiffness in swimming eels.  
637 *Amer. Zool.* **38**, 771-792.
- 638 **Long, J., Koob-Emunds, M., Sinwell, B. and Koob, T. J.** (2002). The notochord of hagfish *Myxine*  
639 *glutinosa*: visco-elastic properties and mechanical functions during steady swimming. *J. Exp.*  
640 *Biol.* **205**:3819-3831.
- 641 **Long, J. H., Schumacher, J., Livingston, N. and Kemp, M.** (2006a). Four flippers or two?  
642 Tetrapodal swimming with an aquatic robot. *Bioinsp. Biomimet.* **1**, 20-29.
- 643 **Long, J., Koob, T., Irving, K., Combie, K., Engel, V., Livingston, N., Lammert, A. and**  
644 **Schumacher, J.** (2006b). Biomimetic evolutionary analysis: testing the adaptive value of  
645 vertebrate tail stiffness in autonomous swimming robots. *J. Exp. Biol.* **209**, 4732-4746.
- 646 **Long, J.H., Krenitsky, N.M., Roberts, S.F., Hirokawa, J., de Leeuw, J. and Porter, M.E.** (2011).  
647 Testing biomimetic structures in bioinspired robots: how vertebrae control the stiffness of the  
648 body and the behavior of fish-like swimmers. *Int. Comp. Biol.* **51**, 158-175.
- 649 **Magnuson, J. J.** (1978). Locomotion by scombrid fishes: hydromechanics, morphology, and  
650 behavior. In Fish Physiology. Vol. VII. Locomotion, (W. S. Hoar and D. J. Randall, eds.), pp.  
651 239-313. New York: Academic Press.
- 652 **McHenry, M. J., Pell, C. A. and Long, J. A.** (1995). Mechanical control of swimming speed:  
653 stiffness and axial wave form in undulating fish models *J. Exp. Biol.* **198**, 2293-2305.
- 654 **Nauen, J. C. and Lauder, G. V.** (2002a). Hydrodynamics of caudal fin locomotion by chub  
655 mackerel, *Scomber japonicus* (Scombridae). *J. Exp. Biol.* **205**, 1709-1724.
- 656 **Nauen, J. C. and Lauder, G. V.** (2002b). Quantification of the wake of rainbow trout  
657 (*Oncorhynchus mykiss*) using three-dimensional stereoscopic digital particle image velocimetry.  
658 *J. Exp. Biol.* **205**, 3271-3279.
- 659 **Quinn, D. B., Lauder, G. V. and Smits, A. J.** (2014). Scaling the propulsive performance of heaving  
660 flexible panels. *J. Fluid Mech.* **738**, 250-267.
- 661 **Peng, J., Dabiri, J. O., Madden, P. G. and Lauder, G. V.** (2007). Non-invasive measurement of  
662 instantaneous forces during aquatic locomotion: a case study of the bluegill sunfish pectoral fin. *J.*  
663 *Exp. Biol.* **210**, 685-698.

- 664 **Peng, J. and Dabiri, D.** (2008). An overview of a Lagrangian method for analysis of animal wake  
665 dynamics. *J. Exp. Biol.* **211**, 280-287.
- 666 **Ramanarivo, S., Godoy-Diana, R. and Thiria, B.** (2013). Passive elastic mechanism to mimic  
667 fish-muscle action in anguilliform swimming. *J. Roy. Soc. Interface* **10**, 20130667.
- 668 **Read, D. A., Hover, F. S. and Triantafyllou, M. S.** (2003). Forces on oscillating foils for  
669 propulsion and maneuvering. *J. Fluids Struct.* **17**, 163-183.
- 670 **Rome, L. C., Swank, D. and Corda, D.** (1993). How fish power swimming *Science* **261**:340-343.
- 671 **Standen, E. M. and Lauder, G. V.** (2005). Dorsal and anal fin function in bluegill sunfish *Lepomis*  
672 *macrochirus*: three-dimensional kinematics during propulsion and maneuvering. *J. Exp. Biol.* **208**,  
673 2753-2763.
- 674 **Syme, D. A. and Shadwick, R.** (2002). Effects of longitudinal body position and swimming speed  
675 on mechanical power of deep red muscle from skipjack tuna (*Katsuwonus pelamis*). *J. Exp. Biol.*  
676 **205**, 189-200.
- 677 **Tangorra, J. L., Lauder, G. V., Hunter, I. W., Mittal, R., Madden, P. G. A. and Bozkurtas, M.**  
678 (2010). The effect of fin ray flexural rigidity on the propulsive forces generated by a biorobotic  
679 fish pectoral fin. *J. Exp. Biol.* **213**, 4043-4054.
- 680 **Tytell, E.D.** (2004). Kinematics and hydrodynamics of linear acceleration in eels, *Anguilla rostrata*.  
681 *Proc. Roy. Soc. Lond. B* **271**, 2535-2540.
- 682 **Tytell, E. D.** (2006). Median fin function in bluegill sunfish *Lepomis macrochirus*: streamwise vortex  
683 structure during steady swimming. *J. Exp. Biol.* **209**, 1516-1534.
- 684 **Tytell, E.D. and Lauder, G.V.** (2008). Hydrodynamics of the escape response in bluegill sunfish,  
685 *Lepomis macrochirus*. *J. Exp. Biol.* **211**, 3359-3369.
- 686 **Tytell, E. D., Standen, E. M. and Lauder, G. V.** (2008). Escaping Flatland: three-dimensional  
687 kinematics and hydrodynamics of median fins in fishes. *J. Exp. Biol.* **211**, 187-195.
- 688 **Webb, P. W.** (1975). Hydrodynamics and energetics of fish propulsion. *Bull. Fish Res. Bd. Can.* **190**,  
689 1-159.
- 690 **Webb, P.** (2006). Stability and maneuverability, In *Fish Biomechanics. Volume 23 in Fish*  
691 *Physiology*, ed R E Shadwick and G V Lauder (San Diego: Academic Press) pp 281-332.
- 692 **Wen, L. and Lauder, G. V.** (2013). Understanding undulatory locomotion in fishes using an inertia-  
693 compensated flapping foil robotic device. *Bioinsp. Biomimet.* **8**, 046013.
- 694
- 695
- 696
- 697

698

**Table**

699

700 Table 1. Linear regression equation parameters and the statistical fit for each foil type and each fish

701 species plotted in Figure 3. Regressions are calculated from all raw data points. ANCOVA results

702 comparing regressions are given in the text.

|           | <b>Slope (s.e.)</b> | <b>Intercept (s.e.)</b> | <b>R<sup>2</sup></b> | <b>Model<br/>F-value (df)</b> | <b>P-value</b> |
|-----------|---------------------|-------------------------|----------------------|-------------------------------|----------------|
| Tan 10    | 8.6 (0.4)           | 2.3 (0.7)               | 0.98                 | 571 (11)                      | <.001          |
| Tan 20    | 8.9 (0.2)           | 0.75 (0.3)              | 0.99                 | 2772 (11)                     | <.001          |
| Yellow 10 | 10.7 (0.6)          | 1.2 (1.1)               | 0.97                 | 310 (11)                      | <.001          |
| Yellow 20 | 11.4 (0.9)          | -0.19 (1.7)             | 0.94                 | 162 (11)                      | <.001          |
| Bluegill  | 9.0 (1.8)           | 3.1 (5.4)               | 0.78                 | 24 (8)                        | <.001          |
| Knifefish | 9.9 (0.6)           | -1.9 (1.2)              | 0.98                 | 304 (11)                      | <.001          |

703

704 df = regression degrees of freedom; s.e. = standard error of estimate

705

706

## Figure captions

707

708

709 Fig. 1. Kinematics of swimming fishes. (a), (b) Ventral images of a clown knifefish  
 710 swimming at  $23 \text{ cm}\cdot\text{s}^{-1}$  and bluegill sunfish swimming  $39 \text{ cm}\cdot\text{s}^{-1}$  respectively when the tail  
 711 tips are at their maximum amplitude. (c), (d) Ventral midlines of the above fish species  
 712 digitized from high-speed videos, with two additional images from intermediate states to  
 713 display the change in shape of the entire fish body over one tail beat cycle. The outlines  
 714 represent the body midlines at four equally-spaced times within a single tail beat cycle. (e), (f)  
 715 Zoomed-in midlines showing the posterior body shape over one tail beat cycle. Dashed lines  
 716 indicate the expanded portion of the fish body waveform shown in the two bottom panels.  
 717 The waveform profiles for these fish closely resemble the shapes formed from flapping foils  
 718 under certain motion programs (see Fig. 2).

719

720 Fig. 2. The Tan 10 cm, Tan 20 cm (flexural stiffness =  $3.3 * 10^{-5} \text{ N}\cdot\text{m}^2$ ), Yellow 10 cm, and  
 721 Yellow 20 cm (flexural stiffness =  $9.9 * 10^{-4} \text{ N}\cdot\text{m}^2$ ) plastic foils actuated at the leading edge  
 722 with an amplitude of +/- 1.0 cm heave at 0.5, 1.0, 2.0, and 3.0 Hz while swimming at self-  
 723 propelled speed and being filmed from below. For each variable condition, one heave cycle is  
 724 shown depicted by four evenly spaced midlines. The number of visible waves increases as  
 725 foil length, flexibility, and frequency increase. Note the overall similarities in waveform  
 726 between the Yellow 10 cm foil moving at 2 Hz, and the bluegill body shapes (Fig. 1f), and  
 727 the Tan 10 cm long foil moving at 2 Hz, and knifefish body shapes (Fig. 1e).

728

729 Fig. 3. Self-propelled speed plotted versus cycle frequency for the different foils and fishes.  
 730 Each point represents a mean with error bars equal to two standard errors. Some error bars  
 731 are hidden behind markers. Regression lines are calculated from entire raw data sets with  
 732 residuals along the y-axis for foils and the x-axis for fishes. The fish regression lines are  
 733 similar to the foil lines demonstrating that the simple flapping foils are a good model for  
 734 undulating fish propulsion. Regression statistics are provided in Table 1. ANCOVA analysis  
 735 demonstrates that the regression lines for the two fish species and both tan foils have similar  
 736 slopes, while the slopes for the two yellow foils are significantly greater (see text for  
 737 discussion).

738

739 Fig. 4. Maximum measured curvatures along the body of foils and fishes swimming at  
 740 different frequencies. Stiff yellow foils have lower maximum curvatures than flexible tan



741 foils and foil length has no impact on maximum curvature. Bluegill sunfish maximum  
742 curvatures fall in the range of the robotic foil models, while the clown knifefish curvatures  
743 are higher than the foil models. These data do not include the high curvatures seen at the  
744 very tip of the flexible knifefish tail (figure 1c).

745

746 Fig. 5. Plots of measured variables from swimming fishes and flexible foils to show how  
747 these variables change with increasing frequency. Error bars are not shown as they would be  
748 contained within the symbols (see Materials and Methods for further error estimates). (a), (b)  
749 Reynolds and Strouhal numbers showing similarities between robotic flapping foils and  
750 fishes. (c), (d), (e) Force and torque ranges measured over 4 seconds oriented with X  
751 upstream, Y in the direction of heave, and Z up the shaft. Yellow foils (flexural stiffness =  
752  $9.9 * 10^{-4} \text{ N}\cdot\text{m}^2$ ) produce higher force and torque ranges than tan foils ( $3.3 * 10^{-5} \text{ N}\cdot\text{m}^2$ ). (f),  
753 (g), (h) Work and cost of transport graphs show yellow foils require more work and energy  
754 per meter to swim but less energy relative to the mass of the foils. Foil length has little impact  
755 on force, torque, and work, but short foils have lower cost of transport relative to mass.

756

757 Fig. 6. Locomotor performance of 10 cm long flexible (tan) and stiff (yellow) foils comparing  
758 thrust and efficiency over a range of different heave and frequency motion programs. Thrust  
759 coefficient and efficiency are dimensionless. Three-dimensional surfaces in the top panels are  
760 available as supplemental MATLAB files (S1.Thrust.surface.fig; S2.Efficiency.surface.fig),  
761 and are plotted based on 52 experimental points at different heaves and frequencies. Plots  
762 below the performance surfaces illustrated in the top panels are shown for free-stream flow at  
763 0.1, 0.2 and 0.3 m/s. Surfaces and lines are the mean of 5 trials; error bars are one standard  
764 error. Plots represent transects through the performance surfaces at different heave values,  
765 and efficiency plots show positive efficiencies only. Note that stiff (yellow) foils have  
766 higher thrust coefficients than more flexible (tan) foils and that at 0.1 and 0.2 m/s swimming  
767 speed there is an efficiency cross-over point where the flexible foil becomes more efficient  
768 than the stiff foil. Self-propulsion occurs where the mean thrust coefficient shown on the y-  
769 axis (averaged over the flapping cycles) is zero.

770

771 Fig. 7. Locomotor performance of 20 cm long flexible (tan) and stiff (yellow) foils comparing  
772 thrust and efficiency over a range of different heave and frequency motion programs. Thrust  
773 coefficient and efficiency are dimensionless. Three-dimensional surfaces in the top panels are  
774 available as supplemental MATLAB files (S1.Thrust.surface.fig; S2.Efficiency.surface.fig),

775 and are plotted based on 52 experimental points at different heaves and frequencies. Surfaces  
776 and lines are the mean of 5 trials; error bars are one standard error. Plots below the  
777 performance surfaces illustrated in the top panels are shown for free-stream flow at 0.1, 0.2  
778 and 0.3 m/s. Efficiency plots show positive efficiencies only. Note that stiff 20 cm long  
779 yellow foils have higher thrust coefficients than the flexible tan foils and are substantially  
780 more efficient at all but the highest frequencies at 0.1 m/s swimming speed. Self-propulsion  
781 occurs where the mean thrust coefficient shown on the y-axis (averaged over the flapping  
782 cycles) is zero.

783

784 Fig. 8. Forces in the x and y-directions and thrust and power coefficients calculated from one  
785 cycle of +/- 1cm heave at 2Hz frequency for the four foils swimming at their self-propelled  
786 speeds. Error bars of two standard errors for variation among cycles are smaller than the  
787 thickness of the lines. (a)  $F_x$  curves have two force peaks for each cycle. (b)  $F_y$  curves have  
788 one peak per cycle and experience forces 10 to 15 times larger than thrust. (c) Thrust  
789 coefficients average to zero over a flapping cycle since the foil is self-propelling. (d) Mean  
790 power coefficients range from 0.24 to 0.47 for the four foils.

791

792 Fig. 9. Hydrodynamic analysis of foil propulsion synchronized with force data for the tan 10  
793 cm foil (left panels, flexural stiffness =  $3.3 \times 10^{-5} \text{ N}\cdot\text{m}^2$ ) and the yellow 10 cm foil (right  
794 panels,  $9.9 \times 10^{-4} \text{ N}\cdot\text{m}^2$ ) at self-propelled speeds (29 cm/s and 32 cm/s respectively) when  
795 actuated at the leading edge at 3Hz and amplitude +/- 1cm. (a), (b) Minimum  $F_x$  occurs just  
796 prior to maximum heave. (c), (d) Maximum  $F_x$  occurs just prior to the heave motion  
797 reaching its midpoint. A strong leading edge vortex is present in both images enhancing  
798 thrust.  $F_y$  is force in the direction of heave and has a 17% phase shift from heave for both tan  
799 and yellow foils. White lines have been added to mark the ventral foil edge of the foils.  
800 Black arrows show the time on the force traces corresponding to each image of flow patterns.  
801 Blue (encoder) curves show the heave motion of the foil with +/- 1 cm excursion.

802

(a)

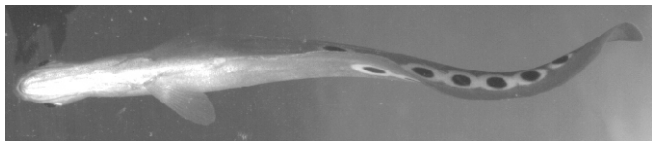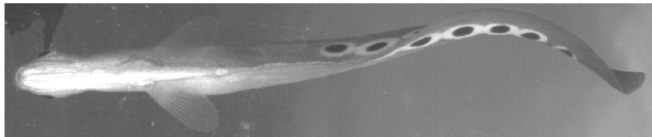

(b)

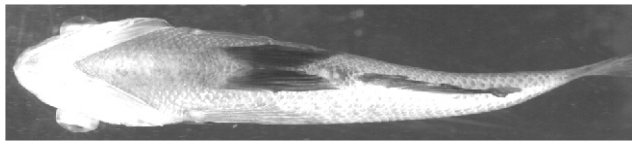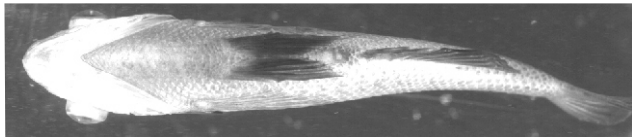

(c)

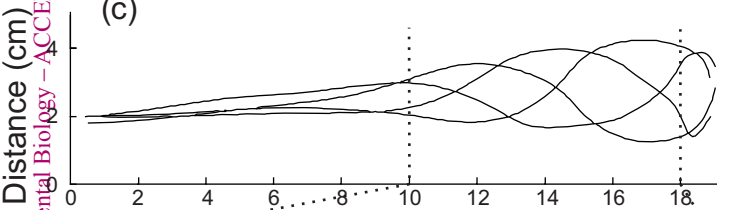

(e)

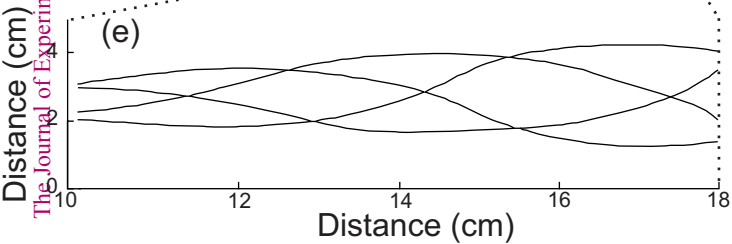

(d)

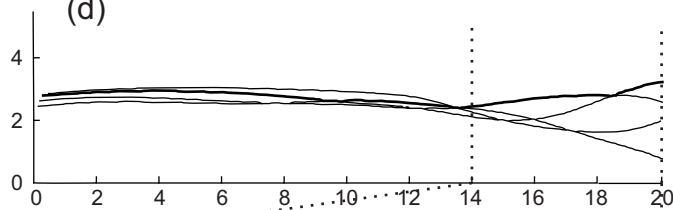

(f)

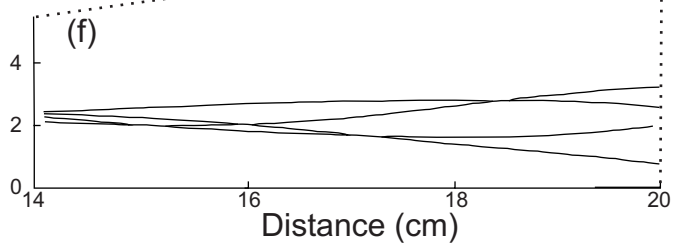

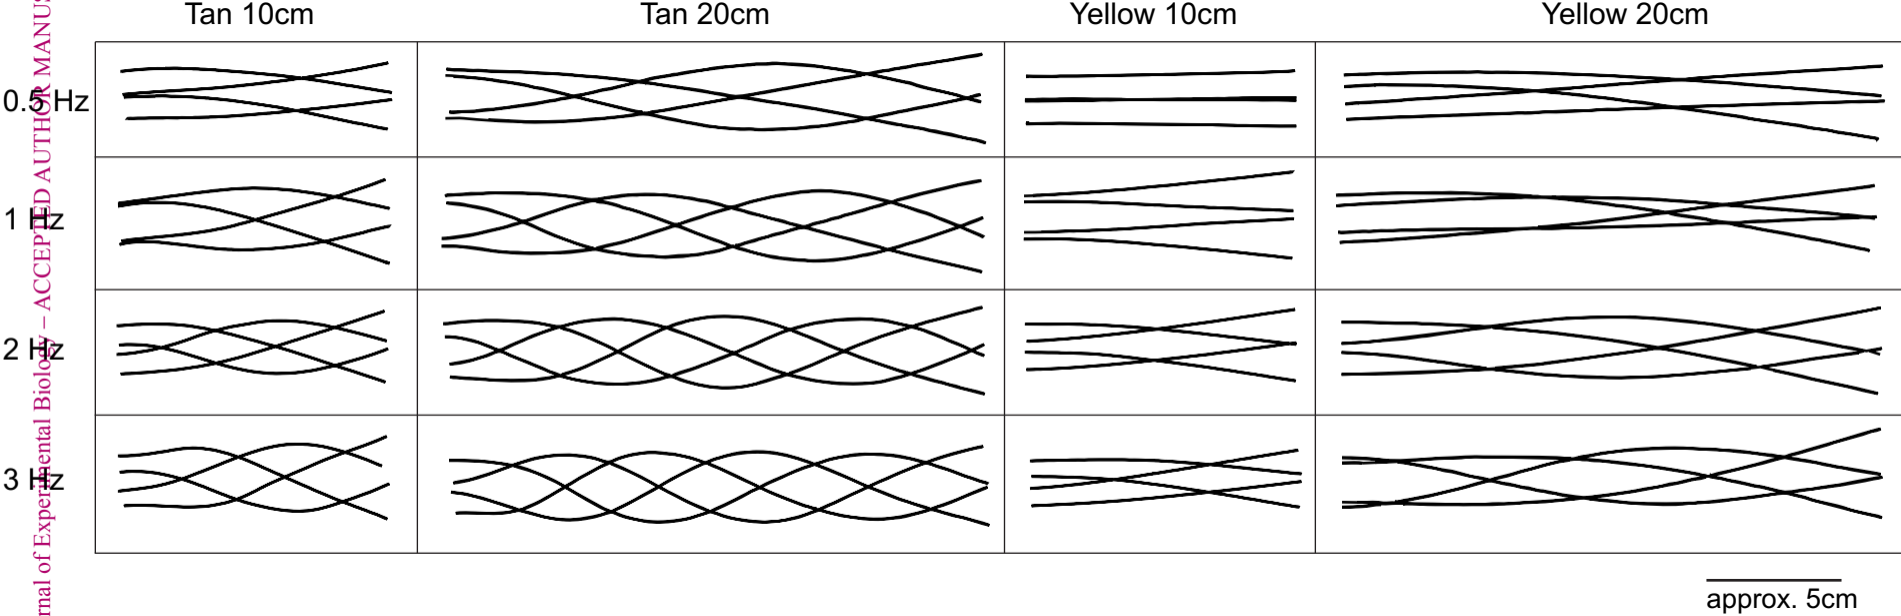

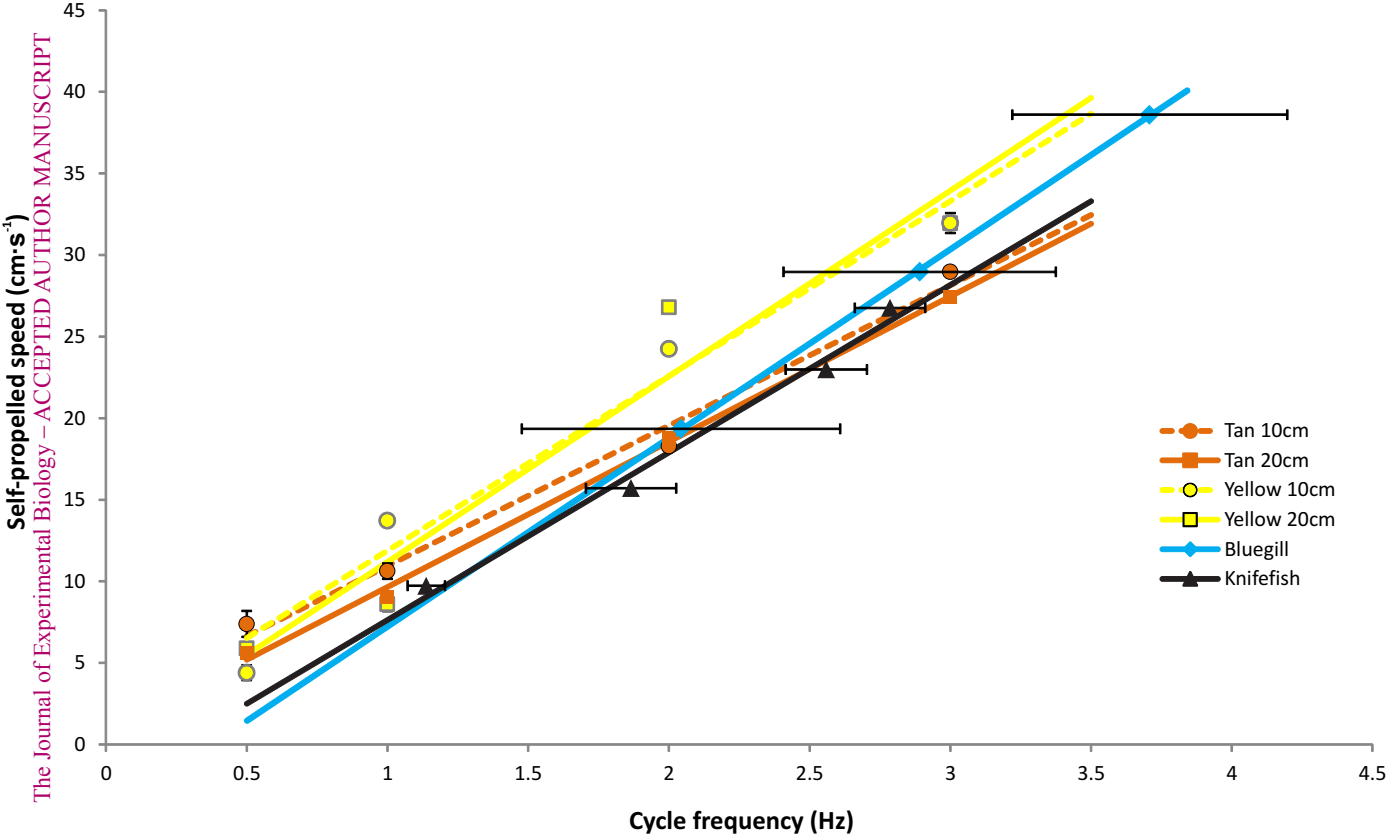

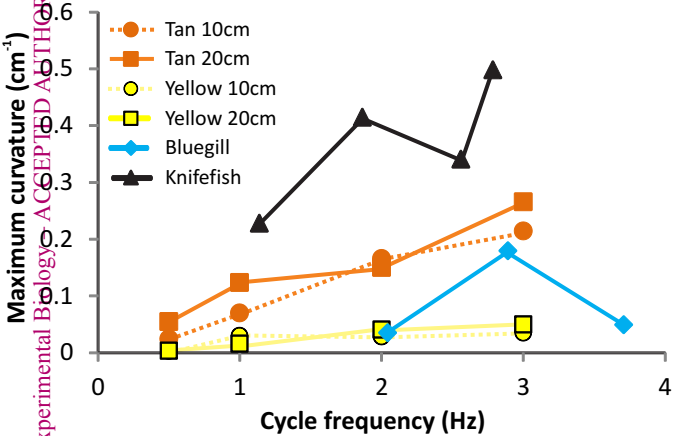

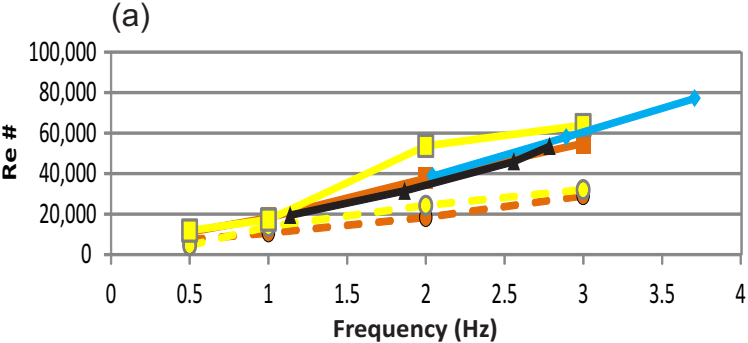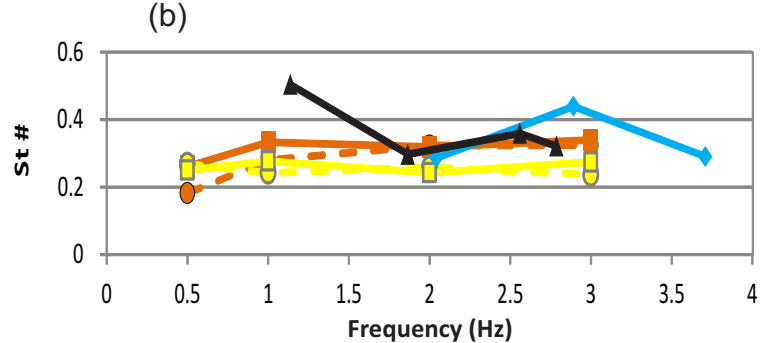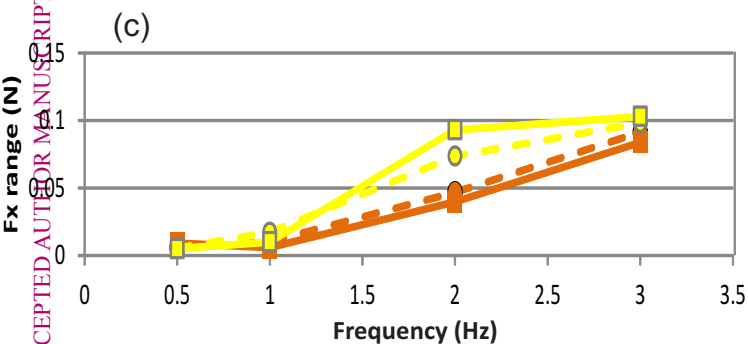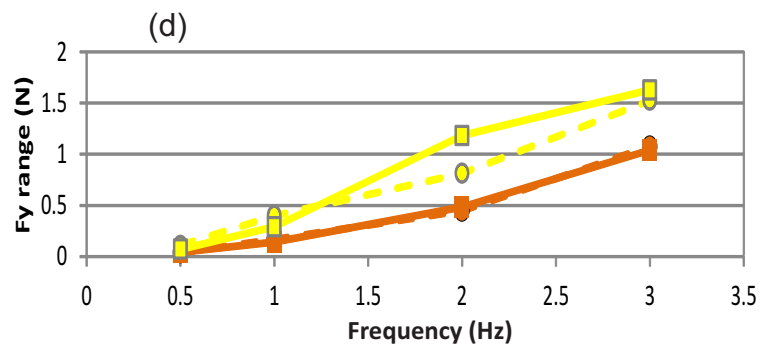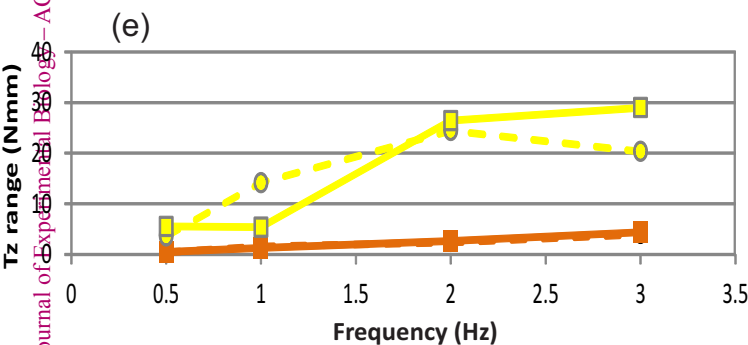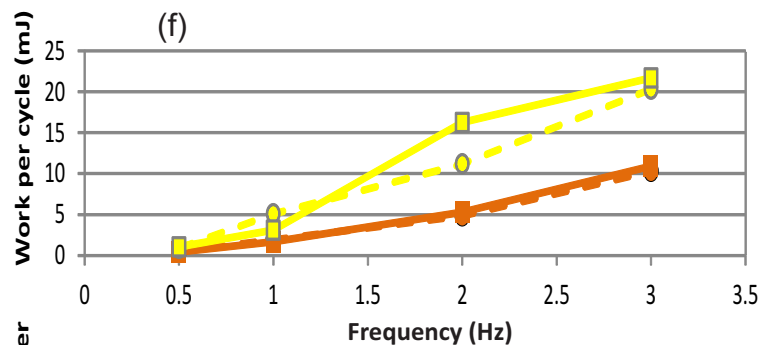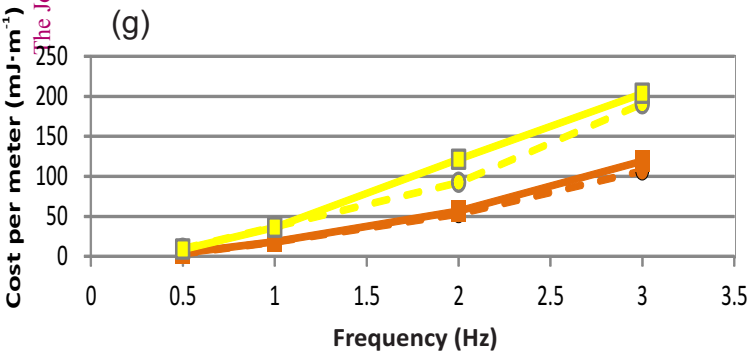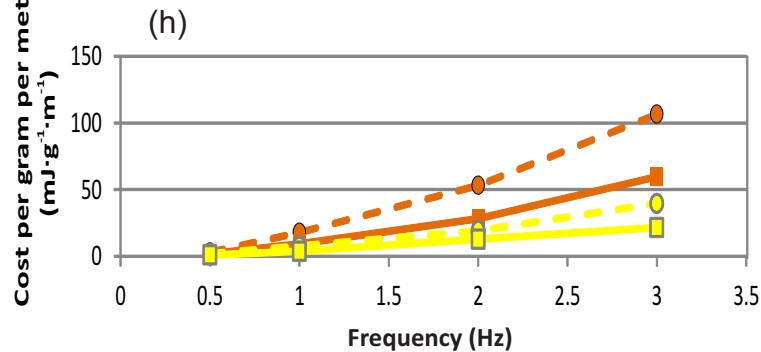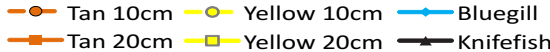

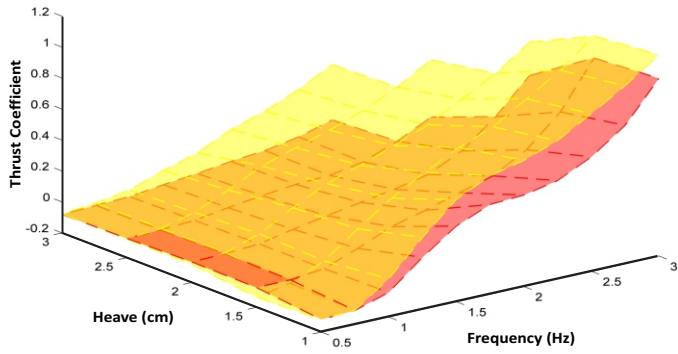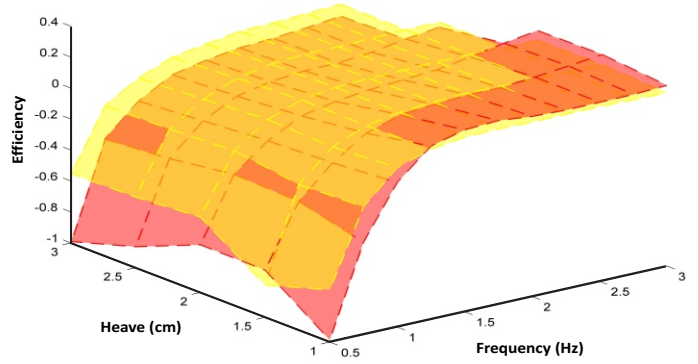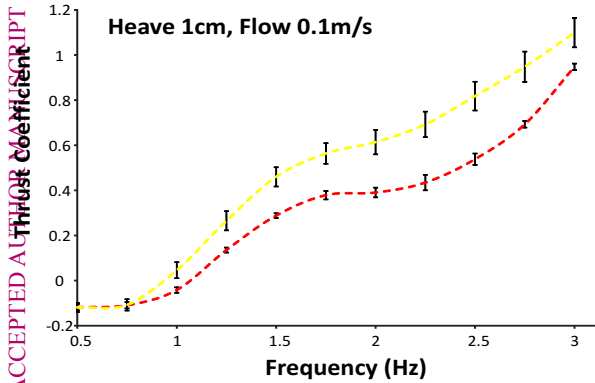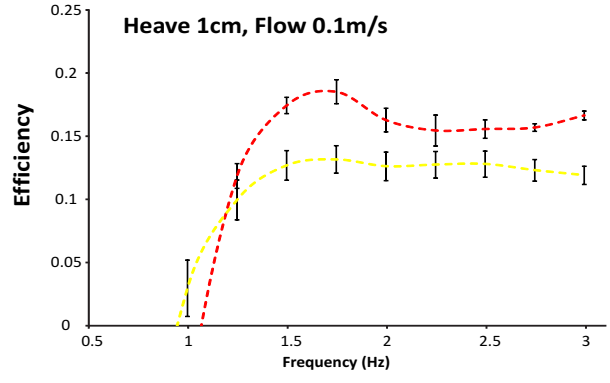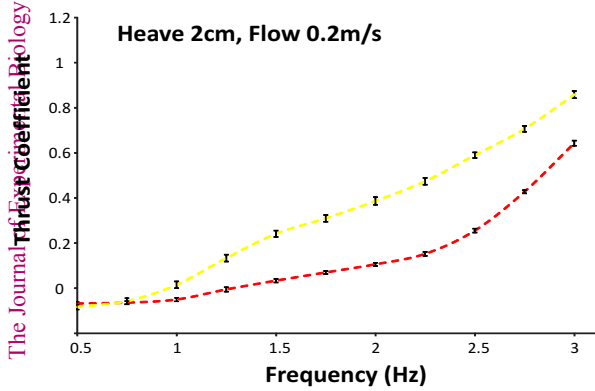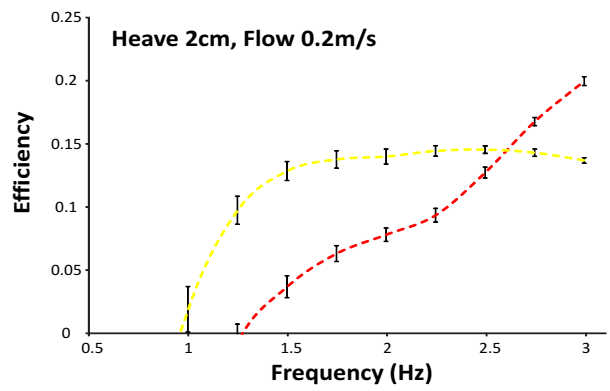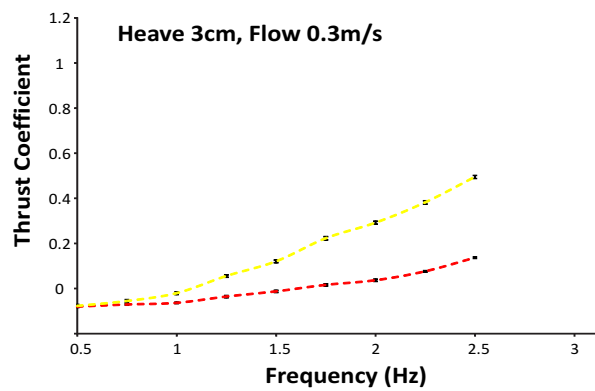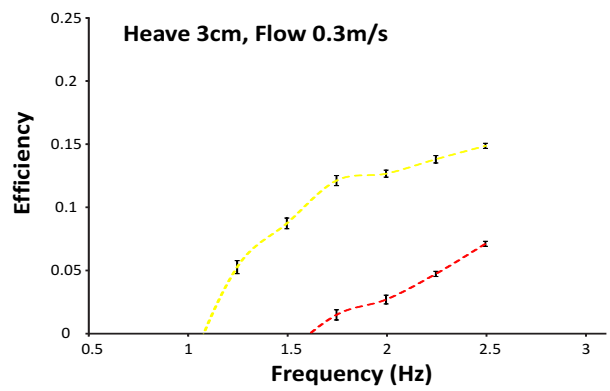

—●— Tan 10cm —●— Yellow 10cm



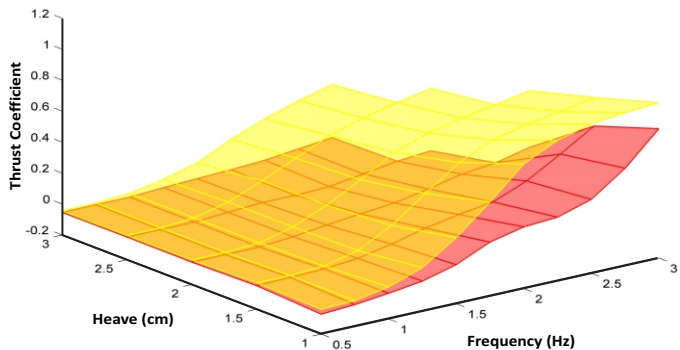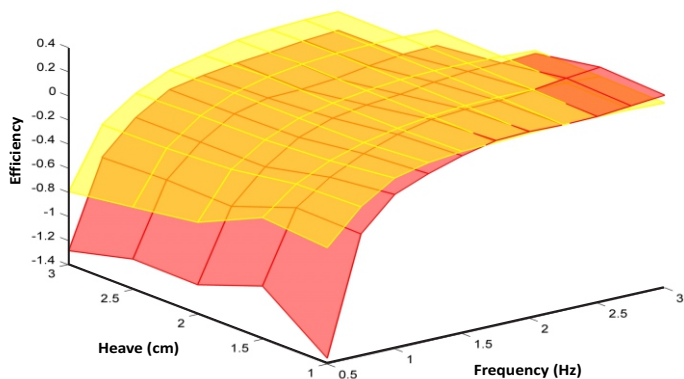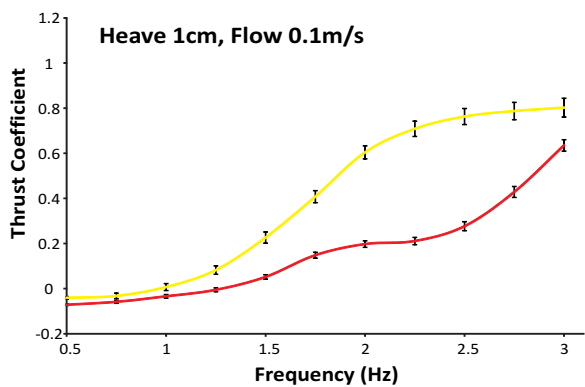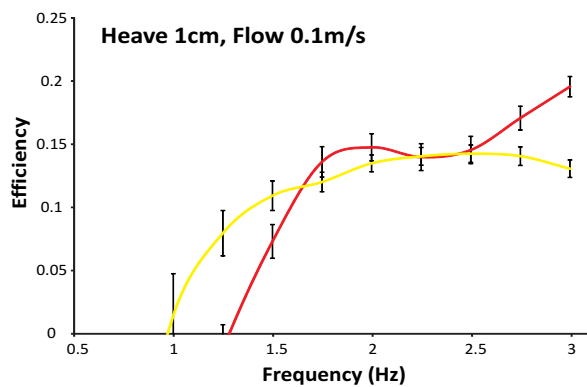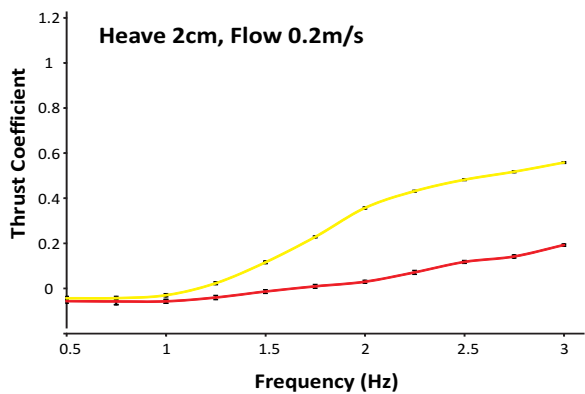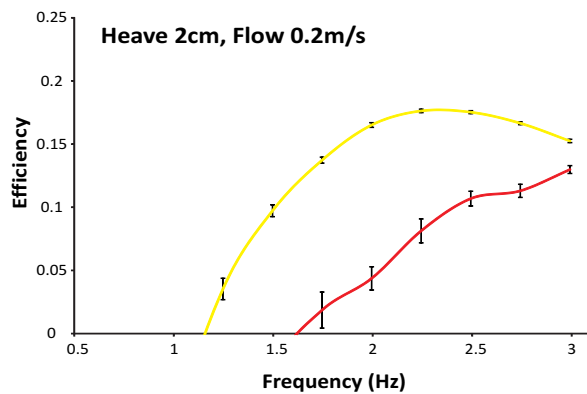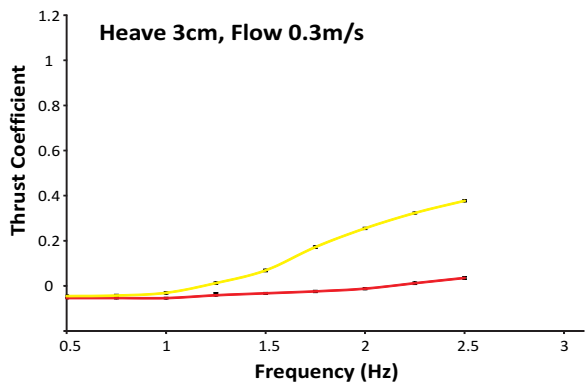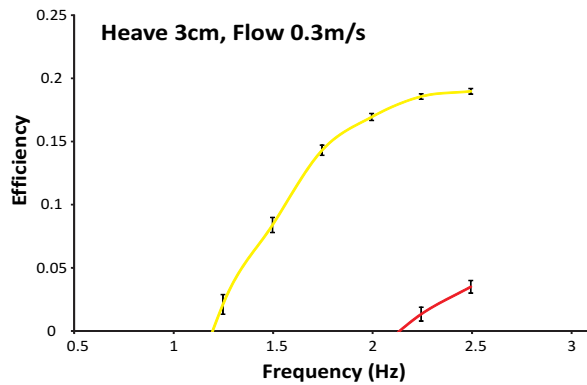

— Tan 20cm — Yellow 20cm

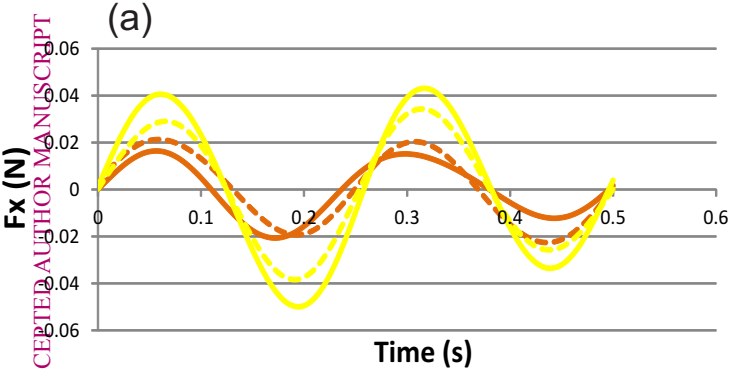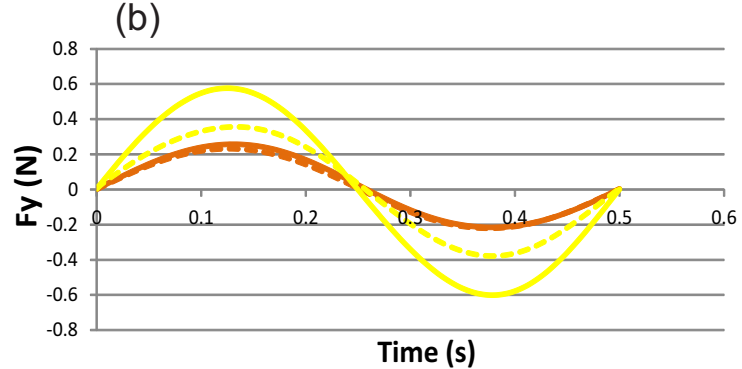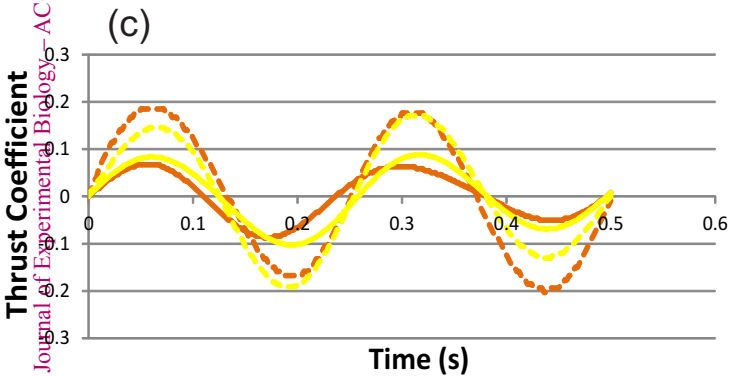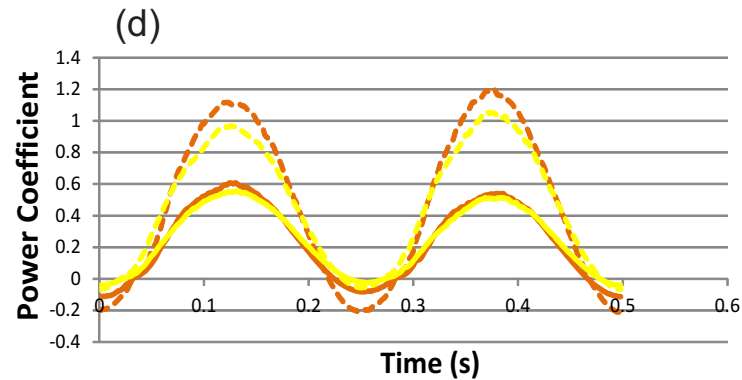

Legend: Tan 10cm (dashed brown), Tan 20cm (solid brown), Yellow 10cm (dashed yellow), Yellow 20cm (solid yellow)

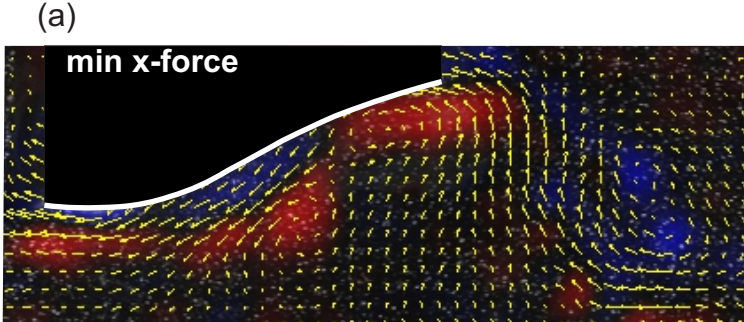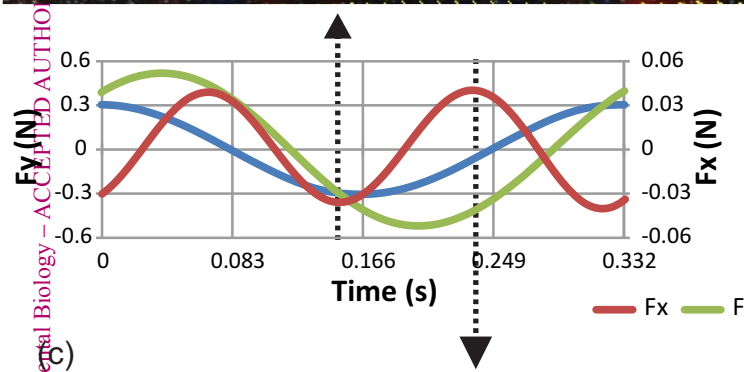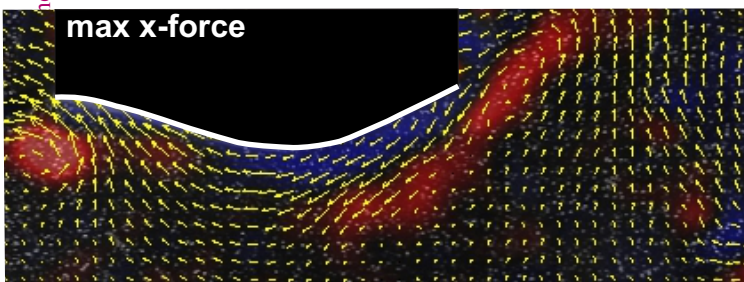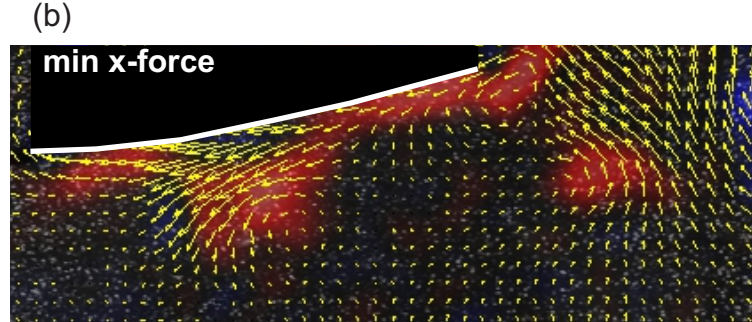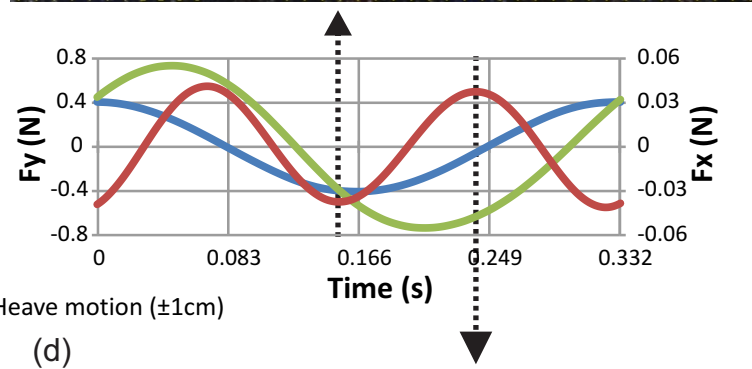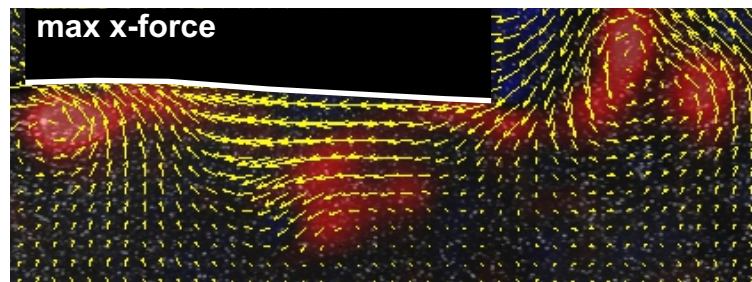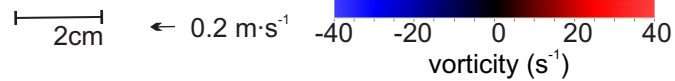

Source: https://cob.silverchair.com/jeb/article-pdf/doi/10.1242/jeb.098046/2037657/jeb_098046.pdf
